# Supplementary material for: Development of a New Biomarker Model for Predicting Preterm Birth in Cervicovaginal Fluid
Source: MDPI journal article supplement (doi:10.3390/metabo12080734), 2022-08-09
Supplement: s1 [file s1]

# Contents Supplementary

Table S1. Quantitative results of SCFA in clinical sample

Table S2. Peak area of polar metabolites in clinical sample

Table S3. Results of statistical analysis

Figure S1. Metabolite level of preterm birth and term birth in cervicovaginal fluid.

Figure S2. Validation of the statistical model used

Figure S3. Metabolic pathway

Figure S4. Comparison of derivatized-SCFA chromatograms using MTBSTFA and BSTFA reagent

Figure S5. Optimization of preparation process of short chain fatty acid

Figure S6. GC/MS chromatogram of blank sample

Figure S7. GC/MS chromatogram of blank sample spiked nine SCFAs

Figure S8. Calibration curves of nine SCFAs

Table S4. Range of calibration curves of nine SCFAs

Table S5. Accuracy, precision, and recovery results of nine SCFAs

Figure S9. Study flowchart for subject selection criteria

Table S6. Clinical characteristics of subjects

Table S1. Quantitated results of SCFA analysis in clinical sample

(Unit : µg/mL)

| Patient | Acetate | Propionate | Isobutyrate | Butyrate | Isovalerate | Valerate | 4-Methyl valerate | Hexanoate | Heptanoate |
|---------|---------|------------|-------------|----------|-------------|----------|-------------------|-----------|------------|
| 1       | N.D.    | 0.883      | N.D.        | 0.143    | N.D.        | BLOQ     | BLOQ              | 0.132     | N.D.       |
| 2       | N.D.    | 0.895      | N.D.        | N.D.     | N.D.        | N.D.     | BLOQ              | 0.149     | N.D.       |
| 3       | N.D.    | 0.836      | N.D.        | 0.047    | N.D.        | N.D.     | BLOQ              | 0.164     | N.D.       |
| 4       | 3.003   | 0.767      | N.D.        | 0.065    | N.D.        | N.D.     | BLOQ              | 0.162     | N.D.       |
| 5       | N.D.    | 0.819      | N.D.        | BLOQ     | N.D.        | BLOQ     | BLOQ              | 0.136     | N.D.       |
| 6       | 20.037  | 0.223      | 0.049       | 0.193    | 0.073       | 0.065    | 0.083             | 0.206     | 0.104      |
| 7       | 1.64    | N.D.       | N.D.        | 0.091    | N.D.        | N.D.     | BLOQ              | 0.255     | N.D.       |
| 8       | N.D.    | 1.316      | N.D.        | 0.108    | N.D.        | N.D.     | BLOQ              | 0.219     | N.D.       |
| 9       | 40.196  | 10.585     | 0.096       | 14.971   | 0.102       | 0.067    | 0.083             | 0.106     | 0.095      |
| 10      | 42.765  | 0.452      | 0.481       | 0.34     | 2.402       | 2.405    | 0.089             | 0.103     | 0.101      |
| 11      | N.D.    | N.D.       | N.D.        | N.D.     | N.D.        | N.D.     | 0.202             | 0.187     | N.D.       |
| 12      | 18.737  | 0.256      | 0.056       | 0.208    | 0.067       | 0.065    | 0.083             | 0.082     | 0.086      |
| 13      | 0.538   | 0.489      | 0.128       | N.D.     | N.D.        | N.D.     | 0.225             | 0.481     | N.D.       |
| 14      | N.D.    | N.D.       | N.D.        | N.D.     | N.D.        | N.D.     | N.D.              | N.D.      | N.D.       |
| 15      | 33.235  | 0.239      | 0.05        | 0.188    | 0.079       | 0.065    | 0.082             | 0.133     | 0.097      |
| 16      | 4.997   | 0.5        | N.D.        | 0.136    | N.D.        | N.D.     | N.D.              | 0.185     | N.D.       |
| 17      | 0.404   | 0.177      | 0.048       | 0.085    | 0.061       | 0.065    | 0.082             | 0.121     | 0.098      |
| 18      | 2.6     | 0.221      | 1.493       | 0.432    | 5.915       | 0.105    | N.D.              | 0.198     | N.D.       |
| 19      | 42.006  | 0.442      | 0.059       | 0.286    | 0.07        | 0.066    | 0.084             | 0.231     | 0.175      |
| 20      | 95.002  | 42.284     | 0.172       | 43.828   | 0.132       | 0.141    | 0.082             | 0.112     | 0.094      |
| 21      | 13.229  | 0.316      | N.D.        | 0.103    | N.D.        | N.D.     | N.D.              | N.D.      | N.D.       |
| 22      | 18.016  | 2.15       | N.D.        | 1.42     | N.D.        | N.D.     | N.D.              | N.D.      | N.D.       |
| 23      | 19.84   | 0.94       | 0.052       | 0.716    | 0.063       | 0.065    | 0.082             | 0.081     | 0.089      |
| 24      | N.D.    | 0.236      | N.D.        | N.D.     | N.D.        | N.D.     | N.D.              | 0.211     | N.D.       |
| 25      | 47.404  | 0.463      | 0.062       | 0.207    | 0.063       | 0.068    | 0.082             | 0.104     | 0.107      |
| 26      | N.D.    | N.D.       | N.D.        | N.D.     | N.D.        | N.D.     | N.D.              | 0.208     | N.D.       |
| 27      | 4.898   | N.D.       | N.D.        | N.D.     | N.D.        | N.D.     | N.D.              | 0.353     | N.D.       |
| 28      | 17.361  | N.D.       | N.D.        | N.D.     | N.D.        | N.D.     | N.D.              | N.D.      | N.D.       |
| 29      | 44.25   | 0.591      | 0.094       | 0.223    | N.D.        | 0.26     | 0.096             | 0.475     | 0.263      |
| 30      | 11.815  | 0.906      | 0.632       | 0.33     | 1.539       | N.D.     | N.D.              | 0.349     | N.D.       |

| Patient | Acetate | Propionate | Isobutyrate | Butyrate | Isovalerate | Valerate | 4-Methyl valerate | Hexanoate | Heptanoate |
|---------|---------|------------|-------------|----------|-------------|----------|-------------------|-----------|------------|
| 31      | 27.207  | 1.107      | N.D.        | 0.164    | N.D.        | N.D.     | BLOQ              | 0.121     | N.D.       |
| 32      | 21.537  | 0.897      | N.D.        | 0.238    | 0.0674      | 0.046    | BLOQ              | 0.289     | N.D.       |
| 33      | N.D.    | 1.595      | N.D.        | 0.148    | N.D.        | BLOQ     | N.D.              | 0.566     | N.D.       |
| 34      | 1.871   | 0.86       | N.D.        | BLOQ     | N.D.        | BLOQ     | N.D.              | 0.16      | N.D.       |
| 35      | N.D.    | 1.668      | BLOQ        | BLOQ     | N.D.        | 0.311    | N.D.              | 7.551     | 0.217      |
| 36      | 0.653   | 0.852      | N.D.        | BLOQ     | N.D.        | N.D.     | BLOQ              | 0.079     | N.D.       |
| 37      | 23.914  | 6.387      | BLOQ        | 0.712    | N.D.        | 0.225    | BLOQ              | 1.007     | 0.34       |
| 38      | 2.617   | 2.717      | 0.097       | 0.292    | N.D.        | 0.121    | BLOQ              | 1.601     | 0.185      |
| 39      | 4.143   | 3.533      | 0.177       | 0.384    | N.D.        | 0.112    | BLOQ              | 0.512     | 0.178      |
| 40      | N.D.    | 1.885      | 0.063       | 0.324    | 0.073       | 0.046    | BLOQ              | 0.758     | 0.112      |
| 41      | 31.742  | 8.438      | 0.655       | 1.1      | N.D.        | 0.167    | BLOQ              | 0.794     | 0.281      |
| 42      | N.D.    | N.D.       | N.D.        | N.D.     | N.D.        | N.D.     | BLOQ              | N.D.      | N.D.       |
| 43      | 53.543  | 12.777     | 0.989       | 1.548    | N.D.        | 0.266    | BLOQ              | 1.042     | 0.313      |
| 44      | 12.472  | N.D.       | 0.259       | 0.431    | N.D.        | N.D.     | BLOQ              | 0.363     | N.D.       |
| 45      | N.D.    | 0.444      | 0.147       | 0.152    | N.D.        | 2.449    | N.D.              | 54.362    | 3.055      |
| 46      | N.D.    | N.D.       | N.D.        | N.D.     | N.D.        | N.D.     | N.D.              | N.D.      | N.D.       |
| 47      | N.D.    | N.D.       | N.D.        | N.D.     | N.D.        | N.D.     | N.D.              | N.D.      | N.D.       |
| 48      | 7.061   | 1.968      | 0.095       | 0.601    | N.D.        | 0.448    | BLOQ              | 0.673     | 0.268      |
| 49      | 6.129   | 1.326      | N.D.        | 0.084    | N.D.        | 0.125    | BLOQ              | 0.426     | 0.191      |
| 50      | 21.753  | 4.934      | 0.322       | 0.427    | N.D.        | 0.204    | BLOQ              | 0.946     | 0.239      |
| 51      | 9.961   | 1.581      | 0.153       | 0.171    | N.D.        | N.D.     | N.D.              | 0.502     | 0.269      |
| 52      | 16.629  | 2.731      | 0.318       | 0.321    | N.D.        | N.D.     | N.D.              | 0.348     | N.D.       |
| 53      | 3.172   | 0.698      | N.D.        | N.D.     | N.D.        | N.D.     | N.D.              | 0.23      | N.D.       |
| 54      | 4.515   | 1.21       | N.D.        | N.D.     | N.D.        | N.D.     | BLOQ              | N.D.      | 0.246      |
| 55      | 21.768  | 3.062      | BLOQ        | 0.495    | N.D.        | N.D.     | BLOQ              | 0.849     | 0.363      |
| 56      | 6.5     | 1.312      | 0.161       | N.D.     | N.D.        | N.D.     | N.D.              | 0.512     | 0.231      |
| 57      | 25.606  | 3.135      | 0.382       | 0.445    | N.D.        | N.D.     | N.D.              | 0.891     | 0.298      |
| 58      | 59.134  | 7.808      | 0.835       | 1.067    | N.D.        | N.D.     | N.D.              | 1.198     | 0.371      |
| 59      | 3.637   | 1.063      | N.D.        | N.D.     | N.D.        | N.D.     | N.D.              | N.D.      | N.D.       |
| 60      | 16.32   | 3.666      | 0.157       | 0.303    | N.D.        | N.D.     | BLOQ              | 0.387     | N.D.       |

| ID | Acetate | Propionate | Isobutyrate | Butyrate | Isovalerate | Valerate | 4-Methyl valerate | Hexanoate | Heptanoate |
|----|---------|------------|-------------|----------|-------------|----------|-------------------|-----------|------------|
| 61 | 5.158   | N.D.       | N.D.        | N.D.     | N.D.        | N.D.     | N.D.              | N.D.      | N.D.       |
| 62 | 1.886   | N.D.       | N.D.        | 0.02     | N.D.        | N.D.     | N.D.              | 0.207     | N.D.       |
| 63 | 22.74   | 0.437      | 0.063       | 0.194    | 0.064       | 0.067    | 0.083             | 0.131     | 0.122      |
| 64 | 2.864   | 0.087      | N.D.        | 0.029    | N.D.        | N.D.     | N.D.              | 0.194     | N.D.       |
| 65 | 44.354  | 0.594      | 0.078       | 0.243    | 0.07        | 0.069    | 0.084             | 0.157     | 0.133      |
| 66 | 47.477  | 0.492      | 0.066       | 0.2      | 0.088       | 0.067    | 0.083             | 0.249     | 0.103      |
| 67 | 3.002   | 1.205      | N.D.        | N.D.     | N.D.        | N.D.     | N.D.              | 0.308     | 0.195      |
| 68 | 15.514  | 0.257      | N.D.        | N.D.     | N.D.        | N.D.     | N.D.              | 0.173     | N.D.       |
| 69 | N.D.    | 0.618      | N.D.        | N.D.     | N.D.        | N.D.     | N.D.              | 0.263     | N.D.       |
| 70 | 40.031  | 0.516      | 0.075       | 0.155    | 0.067       | 0.069    | 0.083             | 0.224     | 0.105      |
| 71 | 3.926   | N.D.       | N.D.        | N.D.     | N.D.        | N.D.     | N.D.              | 0.205     | N.D.       |
| 72 | 7.608   | 1.476      | N.D.        | N.D.     | N.D.        | N.D.     | N.D.              | 0.221     | N.D.       |
| 73 | 15.911  | 8.056      | 0.119       | 10.01    | 0.267       | 0.276    | 0.083             | 0.09      | 0.085      |
| 74 | 3.656   | N.D.       | N.D.        | N.D.     | N.D.        | N.D.     | N.D.              | 0.125     | N.D.       |
| 75 | 2.992   | 0.717      | N.D.        | N.D.     | N.D.        | N.D.     | N.D.              | 0.265     | 0.197      |
| 76 | 1.388   | N.D.       | N.D.        | 0.14     | N.D.        | 0.164    | N.D.              | 0.097     | N.D.       |
| 77 | 3.783   | 1.021      | 0.108       | 0.156    | N.D.        | 0.069    | 0.085             | 0.259     | 0.171      |
| 78 | N.D.    | N.D.       | N.D.        | N.D.     | N.D.        | N.D.     | N.D.              | 0.101     | N.D.       |
| 79 | 16.835  | 1.986      | 0.288       | 0.325    | N.D.        | N.D.     | N.D.              | 0.269     | N.D.       |
| 80 | N.D.    | 0.346      | N.D.        | N.D.     | N.D.        | N.D.     | N.D.              | 0.118     | N.D.       |
| 81 | N.D.    | BLOQ       | N.D.        | N.D.     | N.D.        | N.D.     | N.D.              | 0.103     | N.D.       |
| 82 | 3.37    | 0.731      | 0.046       | 0.141    | 0.064       | 0.065    | 0.082             | 0.11      | 0.092      |
| 83 | 3.844   | 1.075      | 0.132       | 0.232    | 0.076       | 0.066    | 0.088             | 0.289     | 0.176      |
| 84 | 1.989   | 0.538      | 0.091       | 0.137    | 0.065       | 0.066    | 0.085             | 0.16      | 0.112      |
| 85 | 14.877  | 4.211      | 0.444       | 0.571    | 0.09        | 0.073    | 0.094             | 0.781     | 0.302      |
| 86 | 51.123  | 12.697     | 0.167       | 1.535    | 0.21        | 0.219    | 0.083             | 0.102     | 0.092      |
| 87 | N.D.    | 0.547      | N.D.        | N.D.     | N.D.        | N.D.     | N.D.              | 0.219     | N.D.       |
| 88 | 7.338   | 1.787      | 0.181       | 0.229    | 0.073       | 0.068    | 0.084             | 0.342     | 0.15       |
| 89 | 0.982   | 0.364      | 0.05        | 0.09     | 0.062       | 0.065    | 0.083             | 0.129     | 0.093      |
| 90 | 1.178   | 0.34       | 0.073       | 0.109    | 0.063       | 0.066    | 0.083             | 0.142     | 0.105      |

Table S2. Peak area of polar metabolites in clinical sample

| Patient | Glycolic acid | Oxalic acid | Pyruvic acid | Lactic acid | 3-Hydroxy Propanoic acid | Glyceric acid | 3-Hydroxy butanoic acid | Erythronic acid | Succinic acid | Malic acid | Tartaric acid | Leucic acid | Citric acid | Gluconic acid | Myristic acid | Carbamic acid | Ethanol-amine | Amino Malonic acid | Urea   | Creatinine | Uracil | Hypo-xanthine | Xanthine | Guanine | Sulfuric acid | Phosphoric acid | Ethylene glycol | Propylene glycol |
|---------|---------------|-------------|--------------|-------------|--------------------------|---------------|-------------------------|-----------------|---------------|------------|---------------|-------------|-------------|---------------|---------------|---------------|---------------|--------------------|--------|------------|--------|---------------|----------|---------|---------------|-----------------|-----------------|------------------|
| 1       | 70109         | 12222       | 2863291      | 4559321     | 2099                     | 43451         | 17361                   | 8611            | 4187374       | 2601       | N.D.          | 34073       | 1022        | 6348          | 23920         | 162869        | 70150         | 984557             | 244928 | 238526     | 25272  | 43939         | N.D.     | 20165   | N.D.          | 6885467         | 59864           | 36586            |
| 2       | 33287         | 14071       | 1810513      | 2770009     | 1138                     | 37711         | 15304                   | 3295            | 1264718       | 3112       | N.D.          | 17701       | 562         | 2160          | 12982         | 105144        | 48378         | 451644             | 245901 | 66944      | 17209  | 4535          | N.D.     | 22679   | 17957         | 4263914         | 26459           | 16201            |
| 3       | 81679         | 51462       | 150609       | 994534      | 1768                     | 23801         | 12128                   | 14268           | 1978628       | 1537       | N.D.          | 11582       | 4011        | 8922          | 15142         | 117696        | 52293         | 118809             | 670    | 37901      | 28879  | 64951         | N.D.     | 40518   | N.D.          | 4690610         | 28941           | 20780            |
| 4       | 61074         | 20150       | 1266129      | 4638204     | 2227                     | 65054         | 23212                   | 16517           | 385793        | 910        | 49775         | N.D.        | N.D.        | 25034         | 29630         | 161955        | 124248        | 1064688            | 394262 | 324297     | 120400 | 315339        | 1233     | 180300  | 24326         | 6988864         | 46673           | 25685            |
| 5       | 46907         | 27826       | 137957       | 1079066     | 1235                     | 9717          | 23496                   | 2205            | 120228        | 2098       | N.D.          | 10386       | 2210        | N.D.          | 15075         | 137231        | 40205         | 104804             | 1335   | 14378      | 17492  | 21422         | 18766    | 6561    | 24194         | 4235341         | 32466           | 19771            |
| 6       | 62873         | N.D.        | 617615       | 2835636     | 4064                     | 7393          | 41282                   | 4029            | 2252050       | N.D.       | 949936        | 84722       | N.D.        | 11629         | 14469         | 207373        | 110331        | 121261             | 410320 | 62051      | 34742  | 77991         | N.D.     | 62212   | 48076         | 5150051         | 31385           | 22110            |
| 7       | 72868         | N.D.        | 60837        | 228890      | 2482                     | 7013          | 51589                   | 5582            | 15562         | N.D.       | N.D.          | 18842       | 459         | 15787         | 545057        | 4139          | 51017         | 387098             | 3877   | 2306       | N.D.   | 3855          | N.D.     | 55091   | 5262221       | 28722           | 18889           |                  |
| 8       | 80832         | 41093       | 237579       | 674447      | 3375                     | 24152         | 112566                  | 3354            | 137556        | 1528       | 54272         | 4242        | 2550        | 1709          | 16214         | 279119        | 41600         | 24783              | 66710  | 5638       | 4951   | 10698         | N.D.     | 624     | 114494        | 6166706         | 129018          | 240954           |
| 9       | 62014         | 29813       | 23500        | 199905      | 1312                     | 4868          | 18832                   | 3996            | 20412         | 761        | 26300         | N.D.        | 3674        | 213           | 12216         | 191832        | 5934          | N.D.               | 54493  | 2915       | N.D.   | 3324          | 714      | 517     | N.D.          | 4812683         | 35374           | 13951            |
| 10      | 53272         | 5608        | 146137       | 869584      | 1806                     | 12056         | N.D.                    | 8954            | 2000426       | 1756       | N.D.          | 19368       | 1220        | 3207          | 13638         | 118539        | 60813         | 35264              | 373    | 24084      | 15078  | 15057         | N.D.     | 11980   | N.D.          | 5027341         | 31753           | 29727            |
| 11      | 100496        | 120040      | 30348        | 1467677     | 2418                     | 49446         | 3172216                 | 45949           | 201947        | 17531      | N.D.          | 7110        | 306467      | 2202          | 55647         | 110118        | 49372         | 36159              | 1982   | 111971     | 405    | 28753         | 110880   | 13146   | 2757768       | 5879667         | 47750           | 21536            |
| 12      | 106537        | N.D.        | 184509       | 1730508     | 1951                     | 19326         | 9360                    | 7546            | 161930        | 2926       | 236856        | 14445       | 2144        | 11067         | 14264         | 157881        | 105013        | 89495              | 194978 | 32148      | 19880  | 14149         | N.D.     | N.D.    | 9965          | 3205093         | 26602           | 27349            |
| 13      | 27470         | 24290       | 15471        | 235861      | 1069                     | 6813          | 86282                   | 4224            | 16981         | 1976       | 29885         | N.D.        | 30672       | N.D.          | 13656         | 141667        | 18254         | N.D.               | 308469 | N.D.       | 2637   | 3150          | N.D.     | N.D.    | 83687         | 3089368         | 14840           | 9723             |
| 14      | 43821         | 31799       | N.D.         | 61039       | 1351                     | 3849          | N.D.                    | 2630            | 13764         | N.D.       | N.D.          | 1676        | N.D.        | 13723         | 157553        | 4765          | N.D.          | N.D.               | 26026  | N.D.       | 306    | 4037          | N.D.     | 623     | N.D.          | 6218172         | 31696           | 93688            |
| 15      | 360508        | 14355       | 146254       | 623263      | 16329                    | 23380         | 33272                   | 10067           | 141756        | 26136      | N.D.          | 4706        | 33319       | 1871          | 17160         | 128231        | 16587         | 46927              | 13713  | 13944      | 22244  | 14178         | 1101     | 1917    | 36528         | 4205822         | 2431046         | 92430            |
| 16      | 53934         | 47616       | 35388        | 1099992     | 1225                     | 21660         | 7419                    | 7702            | 81684         | 4243       | 132158        | 1684        | 6354        | 3600          | 18940         | 184880        | 152099        | 37172              | 229790 | 72515      | 55844  | 91855         | 3507     | 74108   | N.D.          | 4174167         | 27749           | 21609            |
| 17      | 75351         | 94905       | 40265        | 1031475     | 1100                     | 22528         | 8307                    | 15596           | 82022         | 2864       | 71961         | 4393        | 2613        | 1890          | 8534          | 139080        | 134379        | 48317              | 168359 | 51162      | 42135  | 45427         | 1170     | 19317   | N.D.          | 4253875         | 34088           | 11919            |
| 18      | 36476         | 21525       | 92998        | 541360      | 1428                     | 2629          | N.D.                    | 1446            | 430323        | N.D.       | 32682         | 3085        | N.D.        | 538           | 21103         | 167023        | 45072         | 14892              | 231403 | 23679      | 3579   | 8799          | 220      | 11766   | N.D.          | 4789088         | 66944           | 30569            |
| 19      | 156741        | 91240       | 1009207      | 3105032     | 5292                     | 31585         | 17552                   | 6305            | 2826621       | 1650       | 39485         | 53014       | N.D.        | 5966          | 13416         | 197578        | 122059        | 208448             | 7067   | 82720      | 120519 | 30142         | N.D.     | 82595   | N.D.          | 8427918         | 370170          | 487608           |
| 20      | 30347         | 17710       | 9429         | 58977       | 1216                     | 2857          | 11487                   | 1611            | 5088          | N.D.       | 13177         | N.D.        | 1306        | N.D.          | 8924          | 182837        | 14366         | N.D.               | 86040  | 3186       | 2059   | 2049          | N.D.     | 379     | 11119         | 3229076         | 17367           | 15782            |
| 21      | 27725         | 41313       | 61578        | 567598      | 1458                     | 7248          | 10907                   | 8196            | 120398        | N.D.       | 52405         | 15053       | N.D.        | 1305          | 18317         | 173015        | 66317         | N.D.               | 321778 | 44506      | 4982   | 8332          | 2224     | 11329   | N.D.          | 4508519         | 23677           | 27402            |
| 22      | 45140         | 53960       | 19218        | 333942      | 1564                     | 5978          | N.D.                    | 3346            | 26665         | 1201       | N.D.          | 1442        | 2830        | 1203          | 16000         | 224770        | 19285         | N.D.               | 153567 | 14853      | 927    | 11779         | N.D.     | 2732    | N.D.          | 5786028         | 51556           | 36499            |
| 23      | 31545         | 15435       | 78398        | 576600      | 1339                     | 16961         | N.D.                    | 2288            | 451988        | N.D.       | 54327         | 3599        | N.D.        | 1333          | 11003         | 122578        | 22563         | 23718              | 58444  | 21354      | 7438   | 29635         | 576      | 15787   | N.D.          | 2858045         | 19412           | 9326             |
| 24      | 57159         | 36898       | 43131        | 1190328     | 1426                     | 22723         | N.D.                    | 8132            | 67272         | 2838       | 81848         | 8616        | 1799        | 1928          | 11988         | 193950        | 84298         | 54532              | 152632 | 49168      | 5381   | 27411         | 423      | 12591   | N.D.          | 6740034         | 31550           | 13620            |
| 25      | 68951         | 23276       | N.D.         | 129783      | 2914                     | 3657          | 47202                   | 2668            | 25412         | 1781       | N.D.          | N.D.        | 8397        | N.D.          | 19167         | 226976        | 6495          | N.D.               | 321994 | 3732       | 661    | N.D.          | N.D.     | N.D.    | 46755         | 8779303         | 422597          | 51816            |
| 26      | 50860         | 22945       | 36286        | 481512      | 903                      | 7396          | N.D.                    | 4206            | 415287        | N.D.       | N.D.          | N.D.        | 563         | 1046          | 10935         | 162369        | 38263         | 20646              | 42036  | 24473      | 2444   | 26742         | 112      | 5576    | N.D.          | 3927105         | 20531           | 18948            |
| 27      | 29116         | 35732       | 47164        | 524208      | 975                      | 9254          | 21751                   | 7004            | 14924         | 2137       | 38490         | 1136        | 6220        | 826           | 11994         | 166637        | 50139         | N.D.               | 147050 | 14460      | 11243  | 19889         | 323      | 1045    | N.D.          | 4227365         | 56103           | 10468            |
| 28      | 58660         | 96921       | 11287        | 889340      | 1857                     | 16300         | 29330                   | 21075           | 133682        | 6220       | N.D.          | 1168        | 168054      | 1106          | 33354         | 172128        | 19515         | N.D.               | 629922 | 13925      | N.D.   | 4104          | 3779     | 234     | 294818        | 4633175         | 22319           | 29699            |
| 29      | 14948         | 7501        | 9731         | 368478      | N.D.                     | 1620          | N.D.                    | 929             | 40059         | N.D.       | 16077         | 2176        | N.D.        | 218           | 6290          | 139246        | 10983         | 13012              | 1364   | 7518       | N.D.   | N.D.          | N.D.     | N.D.    | N.D.          | 1806962         | 18783           | 8423             |
| 30      | 50441         | 17283       | 16366        | 125622      | 1387                     | 4315          | 7948                    | 2319            | 9426          | 2194       | 18634         | N.D.        | 1282        | N.D.          | 31096         | 261049        | 15760         | N.D.               | 80969  | 8925       | 1693   | 3596          | N.D.     | 677     | N.D.          | 3625508         | 45101           | 41210            |
| 31      | 64698         | 14897       | 170653       | 3498681     | 1500                     | 51253         | 7175                    | 6941            | 202513        | 4382       | 90996         | 12875       | 8916        | 33556         | 13679         | 80724         | 184806        | 233802             | 316315 | 80797      | 111625 | 143983        | 7858     | 149396  | N.D.          | 5980467         | 72500           | 133852           |
| 32      | 52388         | 9740        | 344774       | 2345414     | 1284                     | 3311          | N.D.                    | 4737            | 1446438       | 782        | 20941         | 29458       | N.D.        | 6650          | 9127          | 57522         | N.D.          | 59543              | 32193  | 25930      | 3526   | N.D.          | N.D.     | 1045    | N.D.          | 5696572         | 62515           | 647571           |
| 33      | 67706         | 28017       | 1355263      | 2717626     | N.D.                     | 81132         | 8147                    | 12629           | 517820        | 1647       | 19831         | 88856       | 515         | 10700         | 7425          | 71890         | 56370         | 78551              | 209857 | 37764      | 22160  | 3037          | N.D.     | 16786   | N.D.          | 6074718         | 44511           | 39366            |
| 34      | 85348         | 23692       | 1436357      | 2676881     | 1821                     | 323204        | 29182                   | 6376            | 3096030       | 5718       | 5523          | 99792       | 845         | 54020         | 15675         | 163404        | 61757         | 225330             | 6232   | 72179      | 143968 | 220256        | 240      | 121360  | 28448         | 4985515         | 72809           | 47474            |
| 35      | 108935        | 41908       | 303224       | 2401121     | 2255                     | 32012         | 11266                   | 12491           | 78336         | 3247       | 13048         | 44345       | 6091        | 4183          | 14063         | 118525        | 32115         | 347391             | 228326 | 34753      | 35630  | 68663         | 2769     | 38798   | 11306         | 5599406         | 37867           | 27159            |
| 36      | 114757        | 21905       | 1602049      | 3966028     | 2607                     | 65089         | 13201                   | 10872           | 3391024       | 2645       | 5634          | 7978        | 587         | 8457          | 10211         | 124718        | 71144         | 222212             | 375173 | 42916      | 6893   | 37007         | 1868     | 22510   | 15512         | 5852120         | 43011           | 32552            |
| 37      | 93071         | 45675       | 220442       | 3442014     | 1865                     | 80060         | 71756                   | 23799           | 288721        | 3907       | 206770        | 38147       | 2017        | 19484         | 15944         | 139136        | 107989        | 599217             | 441359 | 64035      | 212533 | 303848        | 38099    | 149322  | 71909         | 5920311         | 48812           | 30904            |
| 38      | 85505         | 35611       | 265735       | 1298053     | 2267                     | 41805         | 12910                   | 7234            | 309617        | 3357       | 18985         | 11432       | 12375       | 5950          | 12945         | 100163        | 32136         | 60069              | 2814   | 22642      | 4944   | 11684         | N.D.     | 4950    | 12628         | 6757536         | 54157           | 37565            |
| 39      | 113246        | N.D.        | 1037146      | 472789      | 5224                     | 63265         | 18647                   | 7284            | 3501699       | 6250       | 10477         | 35672       | 3837        | 274           | 6392          | 118258        | 124488        | 297095             | 1950   | 38560      | 41649  | 3433          | N.D.     | 242     | 22444         | 4632229         | 57427           | 53091            |
| 40      | 127744        | 26072       | 544622       | 2239124     | 2477                     | 20962         | N.D.                    | 5028            | 92538         | 4416       | 16913         | 14143       | 14171       | 14806         | 11712         | 108768        | N.D.          | N.D.               | 1325   | 8228       | N.D.   | N.D.          | N.D.     | 3607    | N.D.          | 5847186         | 61339           | 97046            |
| 41      | 59673         | 22149       | 552522       | 2028052     | 1661                     | 33359         | 13878                   | 5177            | 368682        | 2117       | 17821         | 17101       | 626         | 12852         | 13947         | 127991        | 79238         | 176328             | 87071  | 42893      | 9398   | 39051         | 782      | 37532   | N.D.          | 5085215         | 39869           | 16998            |
| 42      | 48146         | 4474        | 1058682      | 3644354     | 1213                     | 17592         | N.D.                    | 6842            | 2521558       | 1851       | 2652          | 24596       | 529         | 4702          | 16537         | 133009        | 25867         | 580519             | 318843 | 104647     | 2182   | 55771         | 3357     | 10023   | N.D.          | 4896275         | 36597           | 20672            |
| 43      | 78622         | 53561       | 175433       | 1078783     | 2012                     | 13880         | 9677                    | 10837           | 267055        | 2951       | 16549         | 9007        | 2378        | 12467         | 11929         | 95313         | 21131         | 58663              | 90923  | 19105      | 6865   | 5296          | N.D.     | 3504    | N.D.          | 6189937         | 55857           | 35336            |
| 44      | 68444         | 19982       | 73189        | 2177388     | 1724                     | 34144         | N.D.                    | 12374           | 104077        | 4681</     |               |             |             |               |               |               |               |                    |        |            |        |               |          |         |               |                 |                 |                  |

| Patient | Glycerol | Glycerol-3-phosphate | Alanine | Ornithine | Glycine | Valine  | Leucine | Proline | Isoleucine | Serine  | Threonine | Lysine | Aspartic acid | Phenyl alanine | Glutamic acid | Asparagine | Tyrosine | Histidine | Glutamine | Cystine | Trypto-phan | Methionine | Taurine | Cysteine | Ribose  | Arabinose | Fructose | Mannose | Galactose | Glucose |
|---------|----------|----------------------|---------|-----------|---------|---------|---------|---------|------------|---------|-----------|--------|---------------|----------------|---------------|------------|----------|-----------|-----------|---------|-------------|------------|---------|----------|---------|-----------|----------|---------|-----------|---------|
| 1       | 566477   | 178094               | 1443361 | 59555     | 2386122 | 782220  | 961453  | 108921  | 285669     | 55282   | 86183     | 2646   | 315010        | 559335         | 905272        | N.D.       | 28866    | N.D.      | N.D.      | N.D.    | 215260      | 2775       | N.D.    | 31694    | 1135646 | N.D.      | 30053    | 13657   | 3322      | 458078  |
| 2       | 645730   | 148468               | 674767  | 19381     | 1009072 | 308189  | 398018  | 34249   | 120457     | 49150   | 74445     | 651    | 124858        | 271571         | 397726        | N.D.       | 27313    | N.D.      | N.D.      | N.D.    | 68618       | 824        | 5284    | 17223    | 612161  | N.D.      | 14851    | 8732    | 3940      | 444131  |
| 3       | 612729   | 34433                | 199307  | 7648      | 314137  | 267251  | 339731  | 64088   | 99088      | 18540   | 20397     | 2040   | 70838         | 146106         | 105274        | N.D.       | 13971    | N.D.      | N.D.      | N.D.    | 38050       | 26364      | 15319   | 1752     | 842476  | N.D.      | N.D.     | 12060   | 477       | 354935  |
| 4       | 302639   | 379865               | 1239486 | 173641    | 3248876 | 1088294 | 1354586 | 216086  | 503695     | 78025   | 139935    | 15357  | 566177        | 1269986        | 1564743       | 154194     | 147096   | N.D.      | N.D.      | 72044   | 760269      | 137036     | 34939   | 43113    | 2445383 | N.D.      | N.D.     | 29099   | 13980     | 1410617 |
| 5       | 381530   | 28096                | 132454  | 3578      | 273211  | 216751  | 115782  | 24765   | 24537      | 6265    | 15454     | 2318   | 19297         | 84495          | 10428         | N.D.       | 7141     | N.D.      | N.D.      | N.D.    | 28591       | 10865      | 2670    | 2091     | 128169  | N.D.      | N.D.     | 5318    | 1401      | 231462  |
| 6       | 325051   | 74538                | 3152782 | 243483    | 1856890 | 2448396 | 6848573 | 623492  | 1455066    | 611250  | 424360    | 303551 | 129773        | 929647         | 559246        | 39915      | 94249    | 10322     | 52416     | 27290   | 221662      | 65910      | 492854  | 7527     | 1475133 | 191984    | 31225    | 9411    | 1252      | 656449  |
| 7       | 486454   | 12622                | 1485674 | 15161     | 646159  | 959017  | 1088956 | 520308  | 99718      | 156210  | 145457    | 116981 | 20600         | 209659         | 60860         | 24555      | 16994    | 3090      | 6286      | N.D.    | 56444       | 39711      | 5541    | 7480     | 20524   | 77131     | 4813     | 2533    | 490       | 57022   |
| 8       | 54039    | 20037                | 1081731 | 22210     | 349859  | 650211  | 745563  | 247337  | 134089     | 46188   | 80435     | 4243   | N.D.          | 102679         | 40554         | N.D.       | 7215     | N.D.      | 1790      | N.D.    | 11347       | 9253       | 13976   | 2190     | 159880  | N.D.      | 2346     | 6777    | 647       | 67447   |
| 9       | 158143   | 7600                 | 161313  | 706       | 54178   | 51944   | 66395   | 32156   | 33594      | 11779   | 8987      | 923    | N.D.          | 12295          | 5248          | N.D.       | N.D.     | N.D.      | N.D.      | 1740    | 1277        | 6170       | 2954    | N.D.     | N.D.    | N.D.      | 1920     | N.D.    | 40924     |         |
| 10      | 358202   | 145467               | 192084  | 3284      | 170991  | 192674  | 121387  | 21131   | 17825      | 6593    | 11139     | 1985   | 40333         | 100796         | 51550         | N.D.       | 10296    | N.D.      | N.D.      | N.D.    | 21026       | 2953       | N.D.    | 1656     | 453233  | N.D.      | N.D.     | 8225    | 14815     | 262633  |
| 11      | 646213   | 26569                | 12955   | 1079      | 443347  | 35035   | 14196   | 9353    | 12937      | N.D.    | N.D.      | 4081   | N.D.          | 15807          | 20410         | N.D.       | 10410    | N.D.      | N.D.      | N.D.    | 9455        | 95         | N.D.    | 44972    | 144556  | 201051    | 41490    | 20795   | 13356     | 533057  |
| 12      | 540129   | 10870                | 1504491 | 24727     | 1164326 | 1132651 | 2066077 | 315610  | 827877     | 389891  | 168217    | 101039 | 67296         | 470519         | 382681        | 71970      | 44591    | 12749     | 17092     | N.D.    | N.D.        | 41142      | N.D.    | 1653     | 278891  | 66088     | 7630     | 8670    | 609       | 204237  |
| 13      | 81675    | 2997                 | 246373  | 882       | 86254   | 49394   | 27061   | 64817   | 12244      | 8195    | 19243     | 711    | N.D.          | N.D.           | 7801          | N.D.       | 1250     | N.D.      | 1337      | N.D.    | 806         | 1511       | N.D.    | 1083     | 34446   | N.D.      | 5364     | 4826    | N.D.      | 60767   |
| 14      | 159658   | 13066                | 20651   | 1199      | 29011   | 23790   | 179136  | N.D.    | 4227       | 1613    | N.D.      | 1595   | 7167          | N.D.           | 2332          | N.D.       | N.D.     | N.D.      | N.D.      | N.D.    | 462         | 1544       | N.D.    | 3205     | 32381   | N.D.      | 1704     | N.D.    | 19        | 9187    |
| 15      | 5092     | 101916               | 202892  | 10956     | 164303  | 325888  | 168277  | 61857   | 46583      | 26844   | 41233     | 1624   | 3432          | 47701          | 17675         | N.D.       | 5543     | N.D.      | 175       | N.D.    | 6130        | 11492      | 4503    | 60333    | 316970  | N.D.      | 3273048  | 263209  | 27625     | 214536  |
| 16      | 46449    | 113510               | 950728  | 11331     | 1041255 | 1124075 | 4234141 | 192654  | 1266503    | 456060  | 268968    | 234570 | 132655        | 595961         | 399165        | 74322      | 77010    | 23865     | 6834      | N.D.    | 190496      | 147975     | 84742   | 15974    | 742114  | 159665    | 8532     | 12459   | 679       | 640660  |
| 17      | 169411   | 91371                | 954668  | 11451     | 931982  | 676470  | 1180353 | 104064  | 658551     | 496327  | 208355    | 132510 | 45117         | 429574         | 206836        | 33981      | 65913    | 10024     | 16169     | N.D.    | 74747       | 63862      | 51843   | 20112    | 548176  | 90139     | 6196     | 12856   | 868       | 500074  |
| 18      | 2002     | 3335                 | 233027  | 14737     | 258314  | 312578  | 521167  | 70044   | 135965     | 35570   | 81226     | 329    | 33114         | 152118         | 92845         | N.D.       | 18551    | N.D.      | N.D.      | N.D.    | 11942       | 271        | 12614   | 5430     | 120428  | N.D.      | N.D.     | 3915    | 294       | 282986  |
| 19      | 86005    | 353355               | 2338603 | 82571     | 2808353 | 1410715 | 3209870 | 552453  | 1296051    | 743028  | 589234    | 58702  | 129794        | 498562         | 436231        | 28425      | 90198    | N.D.      | 15418     | N.D.    | 67757       | 735        | 40156   | 7267     | 1643843 | 34723     | 16830    | 45648   | 7083      | 909998  |
| 20      | 340291   | 3574                 | 37306   | 886       | 26971   | 22009   | 9784    | 6040    | 3561       | N.D.    | 2993      | 782    | N.D.          | N.D.           | N.D.          | N.D.       | N.D.     | N.D.      | N.D.      | 532     | 988         | N.D.       | 2394    | N.D.     | N.D.    | N.D.      | N.D.     | 168     | 5250      |         |
| 21      | 20333    | 23837                | 105335  | 4095      | 225896  | 159283  | 72498   | 12244   | 17234      | 5135    | 23755     | 1520   | 15406         | 60619          | 40918         | N.D.       | 7204     | N.D.      | N.D.      | N.D.    | 19235       | 11348      | 21372   | 2617     | 125107  | N.D.      | N.D.     | 11922   | 1016      | 294811  |
| 22      | 6966     | 78980                | 106954  | 4224      | 145900  | 82708   | 225756  | 5800    | 12244      | N.D.    | 11558     | 1941   | 6812          | 30549          | 23557         | N.D.       | 2186     | N.D.      | N.D.      | N.D.    | 4490        | 5142       | 276     | 3845     | 39810   | N.D.      | N.D.     | 3965    | 740       | 53476   |
| 23      | 390358   | 99136                | 235887  | 22518     | 254345  | 203814  | 365789  | 33198   | 174498     | 42776   | 52409     | 799    | 28373         | 133677         | 63528         | N.D.       | 15295    | N.D.      | 2486      | N.D.    | 23293       | 8075       | 24557   | 1787     | 239784  | N.D.      | N.D.     | 5187    | 289       | 222482  |
| 24      | 107657   | 116749               | 628103  | 10573     | 738893  | 382366  | 627377  | 65920   | 336827     | 186441  | 115062    | 8883   | 46324         | 238498         | 191313        | N.D.       | 16974    | N.D.      | 5386      | N.D.    | 40396       | 16819      | 37627   | 5479     | 220459  | N.D.      | 5189     | 11139   | N.D.      | 53948   |
| 25      | N.D.     | 9553                 | 87555   | N.D.      | 48590   | 27443   | 23439   | 27044   | 9455       | 2784    | N.D.      | 3065   | N.D.          | N.D.           | 4964          | N.D.       | N.D.     | N.D.      | N.D.      | N.D.    | 948         | N.D.       | 7471    | 97586    | N.D.    | 128007    | 10634    | 3216    | 5785      |         |
| 26      | 64649    | 104135               | 221505  | 7844      | 261601  | 197012  | 147571  | 27917   | 86796      | 20351   | 34098     | 592    | 17896         | 45098          | 53381         | N.D.       | 2733     | N.D.      | N.D.      | N.D.    | 5381        | 1419       | 21314   | 2470     | 74482   | N.D.      | N.D.     | 3809    | 403       | 58986   |
| 27      | 79671    | 6334                 | 64929   | 3766      | 138200  | 68493   | 49283   | 15559   | 12358      | N.D.    | 7614      | 153    | 11872         | 27660          | 36219         | N.D.       | 4322     | N.D.      | N.D.      | N.D.    | 6792        | 10707      | 16349   | 1790     | 101615  | N.D.      | 2811     | 17837   | N.D.      | 228214  |
| 28      | 47496    | 16804                | 197687  | 6635      | 296155  | 57521   | 13235   | 33425   | 4444       | N.D.    | N.D.      | 1737   | N.D.          | 12520          | 6506          | N.D.       | 2318     | N.D.      | N.D.      | N.D.    | 2035        | 1204       | 4942    | 17166    | 30988   | N.D.      | 16466    | 25492   | 13286     | 101873  |
| 29      | 43200    | 56324                | 78579   | 563       | 87859   | 20988   | 11300   | 2226    | 4479       | 874     | N.D.      | 905    | N.D.          | N.D.           | 5793          | N.D.       | N.D.     | N.D.      | N.D.      | 1369    | 134         | N.D.       | 2633    | 49983    | N.D.    | N.D.      | 1817     | 32      | 9073      |         |
| 30      | 125108   | 13009                | 25534   | 1103      | 33462   | 18765   | 6076    | 1531    | 4221       | 518     | N.D.      | 4295   | N.D.          | N.D.           | 3502          | N.D.       | 2816     | N.D.      | N.D.      | N.D.    | 706         | N.D.       | N.D.    | 14838    | 25910   | N.D.      | N.D.     | 159491  | 144725    | 178621  |
| 31      | 320499   | 145602               | 1468433 | 5936      | 1698629 | 1675248 | 1687147 | 116230  | 723758     | 467576  | 463460    | 161681 | 296358        | 886713         | 802234        | 164092     | 202742   | N.D.      | N.D.      | N.D.    | 533853      | 331676     | 48639   | 53751    | 1506526 | 96045     | 9828     | 141647  | 8007      | 903413  |
| 32      | 284939   | 333766               | 19586   | 2677      | 151687  | 93697   | 98675   | 6837    | 57736      | 8002    | 7905      | N.D.   | 27864         | 98502          | 87292         | N.D.       | 14216    | N.D.      | N.D.      | N.D.    | 68567       | 1329       | N.D.    | N.D.     | 903403  | 52042     | N.D.     | 16709   | N.D.      | 752578  |
| 33      | 374312   | 27702                | 349945  | 1548      | 282697  | 256691  | 247305  | 31139   | 92219      | 51574   | 57398     | N.D.   | 31020         | 131386         | 167944        | N.D.       | 33452    | N.D.      | N.D.      | N.D.    | 18404       | 310        | N.D.    | N.D.     | 772958  | 25406     | 9551     | 15278   | 3095      | 480433  |
| 34      | 395306   | 145835               | 1763501 | 205263    | 1449095 | 1869595 | 2730534 | 476251  | 1005376    | 736050  | 626417    | 33184  | 222594        | 1486400        | 692337        | 74306      | 220319   | N.D.      | 4226      | N.D.    | 451982      | 3418       | 62050   | 43920    | 1769072 | N.D.      | 54072    | 345567  | 2486      | 1271704 |
| 35      | 650233   | 22830                | 1049054 | 8766      | 2020812 | 924127  | 1052679 | 78318   | 426785     | 164254  | 189640    | 30650  | 200051        | 798597         | 388998        | 134120     | 97399    | N.D.      | N.D.      | N.D.    | 291980      | 204963     | N.D.    | 25017    | 744864  | 18654     | 31706    | 13819   | 923       | 710842  |
| 36      | 1079909  | 36433                | 1090026 | 7387      | 1045350 | 981422  | 1634904 | 204107  | 548706     | 285196  | 328314    | 25617  | 161884        | 505167         | 470341        | 46692      | 86829    | N.D.      | N.D.      | N.D.    | 173280      | 5252       | 46269   | 25752    | 503052  | 20169     | 24961    | 44474   | 15476     | 944783  |
| 37      | 456251   | 152557               | 2270744 | 229542    | 3680268 | 2604391 | 420384  | 893041  | 2144354    | 1694719 | 891900    | 662291 | 311358        | 1643044        | 995800        | 306735     | 270914   | 123994    | 6711      | N.D.    | 815031      | 480513     | 167047  | 64444    | 1930003 | 432947    | 121282   | 453628  | 73743     | 1321903 |
| 38      | 636648   | 23962                | 70994   | N.D.      | 266453  | 88405   | 97031   | 13428   | 48029      | 11321   | 11952     | N.D.   | 18330         | 93903          | 45290         | 1979       | 18380    | N.D.      | N.D.      | N.D.    | 39400       | 13559      | N.D.    | N.D.     | 328323  | 32815     | 17069    | 43724   | 182       | 587351  |
| 39      | 391648   | N.D.                 | 276784  | N.D.      | 503767  | 71295   | 110979  | 204771  | 18598      | 17964   | 9249      | N.D.   | 27916         | 36897          | 10126         | 27222      | N.D.     | N.D.      | N.D.      | 43511   | 1093        | 19335      | N.D.    | N.D.     | 406453  | 16789     | 65860    | 11547   | 3376      | 31736   |
| 40      | 228258   | 16994                | 18472   | N.D.      | 44911   | 6620    | 1739    | N.D.    | N.D.       | N.D.    | N.D.      | N.D.   | N.D.          | 27972          | N.D.          | N.D.       | N.D.     | N.D.      | N.D.      | N.D.    | 3032        | 50         | N.D.    | N.D.     | 900833  | N.D.      | 21456    | 27934   | 12063     | 67475   |
| 41      | 346820   | 94963                | 283819  | 3404      | 569903  | 314139  | 277242  | 30107   | 77332      | 55374   | 38921     | N.D.   | 68654         | 352284         | 208783        | N.D.       | 55892    | N.D.      | N.D.      | N.D.    | 138140      | 15470      | 3928    | 9783     | 441186  | N.D.      | 10553    | 26406   | 1301      | 817094  |
| 42      | 326909   | 68182                | 1301972 | 111925    | 2132143 | 983067  | 1892951 | 235613  | 492612     | 313687  | 356148    | 9259   | 304319        | 762529         | 1007305       | 38067      | 92234    | N.D.      | N.D.      | 22345   | 384970      | 23102      | 21990   | 26051    |         |           |          |         |           |         |

| Patient | Glycolic acid | Oxalic acid | Pyruvic acid | Lactic acid | 3-Hydroxy-propanoic acid | Glyceric acid | 3-Hydroxy-Butanoic acid | Erythronic acid | Succinic acid | Malic acid | Tartaric acid | Leucic acid | Citric acid | Gluconic acid | Myristic acid | Carbamic acid | Ethanol-amine | Amino-malonic acid | Urea   | Creatinine | Uracil | Hypo-xanthine | Xanthine | Guanine | Sulfuric acid | Phosphoric acid | Ethylene glycol | Propylene glycol |      |  |
|---------|---------------|-------------|--------------|-------------|--------------------------|---------------|-------------------------|-----------------|---------------|------------|---------------|-------------|-------------|---------------|---------------|---------------|---------------|--------------------|--------|------------|--------|---------------|----------|---------|---------------|-----------------|-----------------|------------------|------|--|
| 46      | 111511        | 69983       | 176855       | 2212254     | 2273                     | 51418         | N.D.                    | 23468           | 268565        | 4395       | 13837         | N.D.        | 8708        | 49224         | 16995         | 134000        | 31323         | 323196             | 141639 | 197852     | 124993 | 224431        | 4160     | 123516  | N.D.          | 6024831         | 37591           | 31672            |      |  |
| 47      | 61660         | 20545       | 2935149      | 4836578     | 1803                     | 68429         | 31022                   | 23562           | 3442594       | 3982       | 15001         | 64579       | 630         | 27517         | 18251         | 160287        | 109269        | 910446             | 547774 | 211399     | 49184  | 440616        | 554      | 122418  | 31968         | 6013092         | 30507           | 14852            |      |  |
| 48      | 78169         | 10045       | 699301       | 3828378     | 2643                     | 65546         | 22056                   | 11491           | 789967        | 20377      | 8326          | 143980      | 12226       | 1149          | 18698         | 156252        | 40648         | 45681              | 2428   | 48484      | 26965  | 42032         | 429      | 14807   | 22295         | 5965108         | 47760           | 29109            |      |  |
| 49      | 69607         | 20301       | 2202306      | 4079651     | 2258                     | 61337         | 12479                   | 8210            | 270820        | 1401       | 2868          | 53171       | 751         | 6022          | 17278         | 149950        | 66452         | 153114             | 260355 | 83518      | 13669  | 84155         | 997      | 49558   | N.D.          | 5779096         | 46200           | 25393            |      |  |
| 50      | 81337         | N.D.        | 652591       | 2170084     | 39450                    | 84090         | 37797                   | 3864            | 3178319       | 4186       | 59984         | 117766      | N.D.        | N.D.          | 15416         | 180772        | 864402        | 86166              | 450455 | 401228     | 12096  | N.D.          | N.D.     | N.D.    | 38418         | 5805177         | 99507           | 110045           |      |  |
| 51      | 56763         | 11434       | 397154       | 3964033     | 2608                     | 27382         | 24383                   | 10467           | 358378        | N.D.       | 18371         | 5365        | 599         | 3301          | 20079         | 165992        | 174667        | 370797             | 388018 | 179933     | 137805 | 159242        | 1632     | 67212   | N.D.          | 6311305         | 43137           | 18757            |      |  |
| 52      | 72259         | 13293       | 179540       | 2438534     | N.D.                     | 16843         | N.D.                    | 5261            | 2253448       | 1409       | 101525        | 8757        | 1557        | 8784          | 14979         | 195128        | 33923         | 38733              | 196379 | 126429     | 10206  | 42507         | 375      | 34637   | N.D.          | 6419940         | 47876           | 36307            |      |  |
| 53      | 65216         | 19730       | 56706        | 2587416     | 1748                     | 17393         | 39992                   | 8819            | 3221270       | 3984       | 14796         | 73113       | 13194       | 6500          | 14604         | 138273        | 239975        | 302227             | 856    | 47858      | 98393  | 74854         | 117      | 41219   | 40701         | 4809441         | 49974           | 24374            |      |  |
| 54      | 91300         | 34213       | 27184        | 2191550     | 1571                     | 42424         | 9162                    | 12782           | 203496        | 728        | 17744         | 1971        | N.D.        | 1147          | 14314         | 151680        | 43087         | 192686             | 119434 | 31508      | 22343  | 34621         | 425      | 33398   | N.D.          | 6252444         | 47972           | 26109            |      |  |
| 55      | 54389         | 10169       | 2334477      | 5647343     | 2081                     | 106104        | 11153                   | 13042           | 301321        | N.D.       | 25719         | 15120       | 30          | 6879          | 19089         | 127459        | 77191         | 538320             | 269622 | 214353     | 93455  | 234307        | 1250     | 57021   | N.D.          | 5764946         | 45355           | 21702            |      |  |
| 56      | 55065         | 9862        | 1920659      | 5168358     | 1856                     | 17960         | 13290                   | 20256           | 4019701       | 6649       | 11499         | 37622       | 680         | 4340          | 25091         | 124466        | 30912         | 885995             | 306555 | 244558     | 9949   | 219044        | N.D.     | 32204   | 16610         | 6708500         | 45517           | 20608            |      |  |
| 57      | 122862        | N.D.        | 281317       | 1960426     | 25824                    | 11653         | 51878                   | 13431           | 6227489       | 175093     | 4708          | 218552      | 5351        | 1526          | 29711         | 208407        | 344501        | 620071             | 148454 | 105884     | 360730 | 106393        | N.D.     | 6262    | 47883         | 9251345         | 74235           | 160025           |      |  |
| 58      | N.D.          | 98914       | N.D.         | 42975       | N.D.                     | N.D.          | N.D.                    | #VALUE!         | 175630        | N.D.       | 152190        | N.D.        | 24830       | N.D.          | 17083         | 186971        | N.D.          | 18471              | 88     | N.D.       | 321    | N.D.          | N.D.     | N.D.    | N.D.          | 4970            | 533902          | N.D.             | N.D. |  |
| 59      | 7957          | 513548      | 4064         | 54415       | N.D.                     | N.D.          | N.D.                    | #VALUE!         | 832367        | N.D.       | 763441        | N.D.        | 163997      | N.D.          | 830341        | 161521        | N.D.          | 92825              | 37     | N.D.       | 328    | N.D.          | N.D.     | N.D.    | N.D.          | 3457            | 1749826         | 7270             |      |  |
| 60      | 10427         | 1543483     | 8391         | 92447       | N.D.                     | N.D.          | 246375                  | #VALUE!         | 2325127       | 809        | 2683209       | N.D.        | 658569      | N.D.          | 79284         | 241450        | 881           | 262148             | 1060   | N.D.       | 273    | N.D.          | N.D.     | N.D.    | N.D.          | 256345          | 3286            | 2392568          | 8695 |  |
| 61      | 34926         | 16329       | 228943       | 2151233     | N.D.                     | 5486          | N.D.                    | 4793            | 153503        | 718        | 192960        | 21113       | 2097        | 3495          | 12083         | 144104        | 143930        | 45060              | 351894 | 60098      | 12958  | 41954         | 228      | 39167   | N.D.          | 4821822         | 33283           | 13927            |      |  |
| 62      | 65129         | 43562       | 99290        | 1703515     | N.D.                     | 25420         | 9644                    | 7877            | 80694         | 3116       | 103577        | 13871       | 9330        | 3747          | 16531         | 164181        | 117698        | 37557              | 270956 | 65768      | 40271  | 77289         | 4780     | 53804   | N.D.          | 5489619         | 37704           | 33026            |      |  |
| 63      | 66540         | 11118       | 413866       | 3725743     | N.D.                     | 16329         | 9745                    | 7280            | 3701088       | 985        | 56806         | 15388       | N.D.        | 5679          | 11547         | 137961        | 214947        | 133222             | 391673 | 172403     | 42017  | 100221        | 273      | 52190   | N.D.          | 6603893         | 43382           | 20093            |      |  |
| 64      | 71020         | 35631       | 688968       | 2307643     | N.D.                     | 8718          | N.D.                    | 5300            | 1229127       | 766        | 73570         | 25142       | 2939        | 2490          | 11272         | 145757        | 60333         | 57803              | 170009 | 77788      | 7690   | 16062         | 106      | 19672   | N.D.          | 6739215         | 48276           | 27887            |      |  |
| 65      | 62360         | 13758       | 909298       | 4465124     | 2006                     | 73213         | 20017                   | 19941           | 551736        | N.D.       | 120591        | 15013       | 516         | 15335         | 16309         | 191121        | 460719        | 459946             | 504687 | 428500     | 179338 | 589133        | 20828    | 186653  | 21681         | 6215142         | 42536           | 18587            |      |  |
| 66      | 45288         | 33546       | 1759416      | 4178906     | 1646                     | 31465         | 18868                   | 7477            | 3217023       | 908        | 108517        | 33473       | 1062        | 4691          | 10048         | 205729        | 7983          | 199287             | 478140 | 81746      | 5866   | 49877         | 7979     | 15588   | N.D.          | 5585962         | 33678           | 14360            |      |  |
| 67      | 41681         | 24117       | 279750       | 1374973     | 1190                     | 7511          | 16517                   | 2590            | 642187        | 1273       | 62084         | 14857       | 1881        | 1690          | 13813         | 156072        | 31313         | 23875              | 107509 | 22923      | 3647   | 16155         | 146      | 11406   | 14741         | 5110829         | 38063           | 13667            |      |  |
| 68      | 55136         | 27157       | 429967       | 2197066     | N.D.                     | 29702         | 15638                   | 14067           | 1031856       | 5613       | 352255        | 22258       | 6350        | 26662         | 18087         | 164677        | 115190        | 107845             | 5690   | 89504      | 42928  | 134127        | 8169     | 2733    | N.D.          | 3348316         | 27752           | 21339            |      |  |
| 69      | 40923         | 31564       | 287915       | 1828040     | 1457                     | 9562          | 7766                    | 3518            | 1063713       | 1011       | 60412         | 39088       | 675         | 1172          | 10474         | 141081        | 54193         | 113116             | 173815 | 21660      | 19375  | 34165         | 483      | 35800   | N.D.          | 4064442         | 38963           | 17143            |      |  |
| 70      | 65181         | 16775       | 681183       | 3594276     | 1802                     | 70759         | 22463                   | 15367           | 415276        | 818        | 281347        | 22573       | 1583        | 1559          | 16364         | 206112        | 40345         | 685110             | 252177 | 240278     | 219684 | 439897        | 3854     | 168809  | 22473         | 4491830         | 69341           | 47088            |      |  |
| 71      | 43989         | 23984       | 214974       | 1266991     | N.D.                     | 10511         | N.D.                    | 3076            | 613141        | 608        | 10349         | 7924        | N.D.        | N.D.          | 10814         | 137880        | 71347         | 119198             | 250577 | 47453      | 16512  | 9843          | 216      | 53217   | N.D.          | 4501592         | 46304           | 31110            |      |  |
| 72      | 27154         | 24200       | 111828       | 710348      | N.D.                     | 3637          | N.D.                    | 2480            | 239195        | 782        | 40352         | 4755        | 761         | N.D.          | 14932         | 161429        | 32724         | 38609              | 108327 | 14840      | 3755   | 3656          | N.D.     | 15230   | N.D.          | 3559056         | 34354           | 22436            |      |  |
| 73      | 37344         | 4793        | 1617115      | 504525      | 62519                    | 13702         | N.D.                    | 7145            | 716469        | 2215       | 14070         | 131042      | 1032        | N.D.          | 17363         | 170525        | 54845         | 405709             | 131389 | 123556     | 134557 | 104138        | 81       | 61322   | N.D.          | 4080938         | 52405           | 93459            |      |  |
| 74      | 54801         | 22653       | 164497       | 1362806     | 1405                     | 11281         | 7694                    | 4409            | 130070        | N.D.       | 74647         | 14700       | 709         | N.D.          | 13507         | 106782        | 31328         | 37656              | 99386  | 56076      | 106656 | 40809         | N.D.     | 54311   | N.D.          | 3482954         | 34086           | 78626            |      |  |
| 75      | 70789         | 90262       | 30872        | 802764      | 2382                     | 10843         | 10439                   | 5284            | 50820         | 2718       | 42200         | 8282        | 2905        | 3593          | 12010         | 133193        | 80549         | 15274              | 112355 | 28304      | 11221  | 42994         | 1296     | 11592   | N.D.          | 5024254         | 87966           | 148717           |      |  |
| 76      | 36884         | 19921       | 138601       | 3365051     | N.D.                     | 57506         | 22851                   | 12366           | 187893        | 6553       | 311734        | 11839       | 16084       | 16518         | 15027         | 144304        | 225357        | 747124             | 459628 | 179090     | 152697 | 183683        | 7732     | 100980  | 24047         | 4609832         | 23803           | 18073            |      |  |
| 77      | 55852         | 22807       | 16412        | 425319      | N.D.                     | 2985          | N.D.                    | 931             | 79524         | N.D.       | 12918         | N.D.        | 681         | N.D.          | 16163         | 187755        | 28910         | 25238              | 22634  | 10672      | N.D.   | N.D.          | N.D.     | N.D.    | N.D.          | 4992774         | 34062           | 35156            |      |  |
| 78      | 37186         | 19459       | 73443        | 1606178     | N.D.                     | 19031         | 10449                   | 5548            | 79975         | 5685       | 137654        | 9517        | 6760        | 4793          | 17614         | 171583        | 25836         | 158583             | 318868 | 60508      | 24717  | 83938         | 5766     | 40607   | N.D.          | 3629062         | 22628           | 19419            |      |  |
| 79      | 55852         | 22463       | 142999       | 213906      | N.D.                     | 5250          | N.D.                    | 2052            | 48197         | 539        | 20574         | 13184       | 679         | N.D.          | 18518         | 223904        | 5820          | N.D.               | 24963  | 3599       | 501    | N.D.          | N.D.     | N.D.    | N.D.          | 4961805         | 30519           | 12970            |      |  |
| 80      | 45222         | 19287       | 104324       | 1615791     | N.D.                     | 14851         | 9754                    | 4515            | 144810        | N.D.       | 187864        | 7135        | N.D.        | 1179          | 14351         | 166343        | 95167         | 99086              | 128613 | 78820      | 33436  | 87531         | 615      | 42866   | N.D.          | 3665152         | 23981           | 16866            |      |  |
| 81      | 77322         | 23451       | 310140       | 2074430     | 1777                     | 18412         | 20584                   | 12570           | 572206        | 5984       | 544241        | 40591       | 18290       | 9538          | 19664         | 192433        | 248288        | 213197             | 476514 | 126201     | 44918  | 144618        | 11062    | 86340   | 52540         | 4949793         | 33207           | 25142            |      |  |
| 82      | 110025        | 15559       | 910862       | 2033796     | 60081                    | 80759         | 22261                   | 9344            | 918034        | 5733       | 275337        | 178886      | 34861       | 1777          | 22256         | 186071        | 85246         | 355745             | 277868 | 145326     | 130316 | 33113         | 6325     | 66722   | 22010         | 7474940         | 43376           | 26452            |      |  |
| 83      | 101030        | 41337       | 23932        | 147092      | N.D.                     | 7088          | 14137                   | 5212            | 32656         | 1620       | 17786         | N.D.        | 7811        | N.D.          | 21621         | 117942        | 9456          | 19834              | 121507 | 9200       | N.D.   | 2117          | N.D.     | 383     | N.D.          | 5123641         | 33453           | 22442            |      |  |
| 84      | 34436         | 30735       | 17904        | 295821      | N.D.                     | 8813          | N.D.                    | 3894            | 31677         | N.D.       | 44033         | N.D.        | N.D.        | N.D.          | 13641         | 182642        | 23617         | 33356              | 90338  | 7813       | 8431   | 13221         | N.D.     | 9923    | N.D.          | 3725577         | 22483           | 29860            |      |  |
| 85      | 71180         | 186335      | 118680       | 1434936     | 3090                     | 42041         | 172465                  | 44247           | 423033        | 6845       | N.D.          | 8184        | 158526      | 4392          | 40101         | 213513        | 75945         | 101842             | 977245 | 118745     | 5067   | 27744         | 2710     | 506     | 172234        | 6904254         | 33475           | 97042            |      |  |
| 86      | 48541         | N.D.        | 700951       | 1647952     | 7685                     | 18628         | 8598                    | 1768            | 2742748       | 1567       | N.D.          | 65216       | 725         | N.D.          | 12128         | 157468        | 278252        | 158905             | 159018 | 138921     | 20676  | 17380         | N.D.     | 901     | N.D.          | 3709008         | 25015           | 29492            |      |  |
| 87      | 60900         | 46657       | 28259        | 1397950     | N.D.                     | 38843         | N.D.                    | 8255            | 77598         | 3868       | 113516        | N.D.        | 3998        | 1317          | 17035         | 246962        | 115897        | 232669             | 339477 | 91727      | 61553  | 112717        | 2139     | 50652   | N.D.          | 4160528         | 21683           | 11475            |      |  |
| 88      | 41031         | 20514       | N.D.         | 33163       | N.D.                     | 2659          | N.D.                    | 1363            | 4526          | N.D.       | 22036         | N.D.        | N.D.        | N.D.          | 10239         | 261143        | 4787          | 16681              | 12697  | N.D.       | N.D.   | N.D.          | N.D.     | N.D.    | N.D.          | 4323012         | 33487           | 44314            |      |  |
| 89      | 25623         | 40813       | 7            |             |                          |               |                         |                 |               |            |               |             |             |               |               |               |               |                    |        |            |        |               |          |         |               |                 |                 |                  |      |  |

| Comprehensive Metabolic Panel (CMP) and Urinary Organic Acids Analysis |          |                      |         |           |         |         |          |         |            |         |           |         |               |                |               |            |          |           |           |         |            |            |         |          |         |           |          |         |           |         |
|------------------------------------------------------------------------|----------|----------------------|---------|-----------|---------|---------|----------|---------|------------|---------|-----------|---------|---------------|----------------|---------------|------------|----------|-----------|-----------|---------|------------|------------|---------|----------|---------|-----------|----------|---------|-----------|---------|
| Patient                                                                | Glycerol | Glycerol-3-phosphate | Alanine | Ornithine | Glycine | Valine  | Leucine  | Proline | Isoleucine | Serine  | Threonine | Lysine  | Aspartic acid | Phenyl alanine | Glutamic acid | Asparagine | Tyrosine | Histidine | Glutamine | Cystine | Tryptophan | Methionine | Taurine | Cysteine | Ribose  | Arabinose | Fructose | Mannose | Galactose | Glucose |
| 46                                                                     | 427767   | 124413               | 228816  | 11748     | 1673392 | 270259  | 301344   | 44089   | 91276      | 47781   | 64331     | N.D.    | 138220        | 257016         | 303169        | N.D.       | 52546    | N.D.      | N.D.      | N.D.    | 154078     | 38553      | 6331    | N.D.     | 1779248 | N.D.      | 101128   | 100372  | 54294     | 1258526 |
| 47                                                                     | 270474   | 278084               | 2428170 | 65814     | 2889976 | 1800349 | 638652   | 335325  | 1102578    | 1328083 | 895077    | 142964  | 326017        | 1442545        | 1353555       | 117312     | 209053   | N.D.      | N.D.      | N.D.    | 597195     | 6254       | 48358   | 109500   | 2180222 | 107683    | 53315    | 112904  | 7623      | 1048859 |
| 48                                                                     | 436719   | 17683                | 111369  | 7981      | 313309  | 243803  | 186956   | 44679   | 36431      | 6637    | 11239     | N.D.    | 68263         | 249165         | 71671         | N.D.       | 6536     | N.D.      | N.D.      | N.D.    | 61145      | 16568      | 1576    | N.D.     | 513463  | N.D.      | 8756     | 4886    | 3070      | 48039   |
| 49                                                                     | 298629   | 86425                | 1547978 | 43371     | 1055227 | 769632  | 1245036  | 137004  | 342503     | 56985   | 106326    | N.D.    | 197197        | 872084         | 579065        | 33476      | 79475    | N.D.      | N.D.      | N.D.    | 223738     | 3403       | 23194   | 25672    | 857778  | N.D.      | 35956    | 13303   | 6581      | 680153  |
| 50                                                                     | 336309   | 57809                | 1012889 | 0         | 547209  | 237232  | 193719   | 1330751 | 36871      | 6242    | 17282     | N.D.    | 146521        | 84521          | 415254        | 69463      | N.D.     | N.D.      | N.D.      | 164170  | 9936       | 24713      | N.D.    | 19770    | 254156  | 23084     | 11758    | 2981    | 6620      | 29910   |
| 51                                                                     | 340037   | 136372               | 1588238 | 18233     | 3522241 | 2087987 | 2834283  | 480564  | 865088     | 347866  | 487245    | N.D.    | 397897        | 1151309        | 679555        | 73631      | 83464    | N.D.      | N.D.      | N.D.    | 172414     | 438122     | N.D.    | N.D.     | 945031  | N.D.      | 11732    | 14136   | 8138      | 1082201 |
| 52                                                                     | 342204   | 141546               | 1653076 | 6940      | 1532299 | 1731521 | 6593370  | 638642  | 1397611    | 947294  | 554526    | 642905  | 149902        | 1118519        | 722312        | 84852      | 70320    | N.D.      | N.D.      | N.D.    | 206158     | 159777     | 57639   | N.D.     | 493401  | 479837    | 21422    | 16441   | 3390      | 513879  |
| 53                                                                     | 401176   | 34571                | 1380077 | 5258      | 1399792 | 834080  | 1260864  | 226265  | 407514     | 474590  | 366419    | 19683   | 272458        | 676348         | 460915        | 102249     | 24514    | N.D.      | N.D.      | N.D.    | 246852     | 165706     | N.D.    | N.D.     | 718660  | N.D.      | 58385    | 23997   | 24420     | 563183  |
| 54                                                                     | 428505   | 906190               | 545943  | 15961     | 856808  | 405582  | 267432   | 27319   | 128899     | 42492   | 34417     | N.D.    | 156844        | 294719         | 283520        | N.D.       | 17290    | N.D.      | N.D.      | 19353   | 76106      | 85471      | N.D.    | N.D.     | 555162  | 77771     | N.D.     | 31758   | 1289      | 328694  |
| 55                                                                     | 341140   | 131828               | 1417216 | 98637     | 2904284 | 1275068 | 1504713  | 150055  | 488436     | 73434   | 74081     | N.D.    | 417791        | 1263530        | 1139698       | 99756      | 36200    | N.D.      | N.D.      | N.D.    | 83808      | 40350      | N.D.    | 32713    | 452490  | N.D.      | 18973    | 8046    | 1191      | 196025  |
| 56                                                                     | 360418   | 195154               | 1252285 | 117376    | 3195585 | 1024458 | 1500419  | 130359  | 482480     | 46444   | 74195     | N.D.    | 345817        | 800015         | 1148088       | 30385      | 60557    | N.D.      | N.D.      | N.D.    | 682651     | 7832       | N.D.    | 66444    | 1162623 | N.D.      | 44942    | 20755   | 4207      | 484662  |
| 57                                                                     | 746280   | 79219                | 1480340 | 37518     | 2936010 | 2615674 | 1916203  | 294880  | 567770     | 356105  | 573821    | N.D.    | 495830        | 833953         | 214927        | N.D.       | 46229    | N.D.      | N.D.      | N.D.    | 387499     | 564542     | N.D.    | 31832    | 1785888 | N.D.      | 39860    | 18362   | 148718    | 532739  |
| 58                                                                     | 1393     | N.D.                 | 15075   | N.D.      | 144822  | 56605   | 32865    | 17021   | 44532      | 4889    | 21696     | N.D.    | 7613          | 28296          | 5473          | 20448      | N.D.     | N.D.      | N.D.      | N.D.    | 19077      | N.D.       | N.D.    | N.D.     | 112542  | N.D.      | 42160    | 37319   | 25666     | 463     |
| 59                                                                     | 1125     | 10281                | 45408   | N.D.      | 416658  | 204946  | 176186   | 103210  | 233404     | 48419   | 156351    | N.D.    | 83077         | 304356         | 49186         | 52135      | N.D.     | N.D.      | N.D.      | N.D.    | 257090     | N.D.       | 78876   | 282015   | N.D.    | 150393    | 143944   | 113835  | 4490      |         |
| 60                                                                     | 260      | 9756                 | 240953  | 7728      | 1141409 | 605489  | 541432   | 326436  | 737828     | 259361  | 663524    | N.D.    | 243139        | 994192         | 228524        | 142734     | 13808    | N.D.      | N.D.      | 10159   | N.D.       | 802806     | N.D.    | 166609   | 628898  | N.D.      | 355585   | 311494  | 254969    | 10407   |
| 61                                                                     | 187117   | 68847                | 1872602 | 156845    | 1619353 | 1415008 | 4724487  | 379953  | 1037363    | 598741  | 451911    | 516546  | 157088        | 760659         | 540460        | 75569      | 86587    | 5538      | 21733     | N.D.    | 200416     | 155465     | 118336  | N.D.     | 216206  | 321755    | 17137    | 18176   | N.D.      | 423095  |
| 62                                                                     | 409897   | 220693               | 628697  | 12027     | 785901  | 737971  | 1571776  | 141768  | 573469     | 183539  | 167629    | 31492   | 113352        | 524234         | 318773        | N.D.       | 72964    | N.D.      | 5290      | N.D.    | 187593     | 132248     | 77499   | N.D.     | 705518  | N.D.      | 6741     | 15691   | 1977      | 707384  |
| 63                                                                     | 394014   | 130895               | 1544553 | 107514    | 2164744 | 1082968 | 2279644  | 371277  | 835534     | 509745  | 346453    | 303828  | 260426        | 942060         | 962110        | 92877      | 63259    | N.D.      | 6899      | 23451   | 274778     | 49155      | 32759   | N.D.     | 999869  | 183871    | 9426     | 7005    | 105       | 583379  |
| 64                                                                     | 362191   | 49723                | 990243  | 37056     | 861455  | 494070  | 1314319  | 239070  | 342443     | 120169  | 171645    | 4566    | 43440         | 238001         | 283587        | N.D.       | 16087    | 11552     | N.D.      | N.D.    | 47591      | 9731       | 45276   | N.D.     | 460743  | N.D.      | 9533     | 6633    | N.D.      | 121407  |
| 65                                                                     | 218361   | 324599               | 2506803 | 379151    | 4412483 | 2751193 | 10543823 | 1005223 | 2463727    | 1685717 | 1162905   | 1643447 | 589987        | 2399719        | 2087863       | 932178     | 181995   | N.D.      | N.D.      | 87178   | 779512     | 353118     | 74710   | 105435   | 767537  | 1047372   | 26126    | 53055   | 1981      | 733943  |
| 66                                                                     | 693724   | 199692               | 2104683 | 179131    | 2284958 | 1547407 | 2709083  | 459035  | 818232     | 206501  | 394364    | 184785  | 156432        | 880755         | 760635        | 31961      | 69607    | N.D.      | 19502     | 556655  | 214584     | 5188       | 86216   | 26120    | 594331  | 125670    | 20014    | 12795   | 4670      | 533168  |
| 67                                                                     | 214478   | 21267                | 364718  | 3466      | 239563  | 176174  | 329791   | 38180   | 84460      | 22023   | 56997     | 2054    | 8384          | 113078         | 75071         | N.D.       | 12562    | N.D.      | N.D.      | N.D.    | 35360      | 9694       | 30525   | N.D.     | 336615  | 146139    | N.D.     | 7356    | 70        | 338270  |
| 68                                                                     | 154732   | 53068                | 1675113 | 8231      | 1274613 | 1328436 | 4355048  | 536260  | 929724     | 491335  | 384568    | 185992  | 215386        | 725059         | 436909        | 90288      | 105558   | N.D.      | 35843     | 26141   | 150644     | 1117       | 236266  | 10499    | 3308431 | 121783    | N.D.     | 93512   | 1819      | 809766  |
| 69                                                                     | 212838   | 28921                | 741241  | 7315      | 692597  | 765894  | 769519   | 85922   | 315053     | 252830  | 242501    | N.D.    | 87262         | 458815         | 197566        | N.D.       | 42243    | N.D.      | N.D.      | 233501  | 137821     | 78816      | 32042   | N.D.     | 286440  | N.D.      | N.D.     | 8884    | 2252      | 416287  |
| 70                                                                     | 247264   | 337916               | 2813047 | 1075996   | 4839596 | 3199085 | 12531792 | 2336875 | 3141873    | 2512406 | 2014138   | 2347035 | 913771        | 2867933        | 2466563       | 1568826    | 336587   | 107373    | 5748      | 147781  | 974085     | 826167     | 160195  | 57881    | 768950  | 1521409   | 17524    | 38427   | 36865     | 484577  |
| 71                                                                     | 225303   | 22769                | 355080  | 36450     | 584745  | 988547  | 1476107  | 301873  | 491431     | 364831  | 299416    | 56039   | 91172         | 537635         | 320002        | 19845      | 63139    | N.D.      | 14435     | N.D.    | 107334     | 16478      | 22361   | N.D.     | 397195  | 32333     | 5602     | 11532   | N.D.      | 296488  |
| 72                                                                     | 155557   | N.D.                 | 173285  | 12002     | 221703  | 247605  | 347576   | 54873   | 68701      | 85750   | 100204    | N.D.    | 22971         | 193370         | 85830         | N.D.       | 31771    | N.D.      | N.D.      | N.D.    | 37622      | 15629      | 12360   | N.D.     | 374705  | N.D.      | N.D.     | 7959    | N.D.      | 391064  |
| 73                                                                     | 143917   | 125499               | 574570  | 15193     | 3055729 | 564348  | 964941   | 775389  | 293220     | 304439  | 153378    | N.D.    | 142194        | 323566         | 303320        | N.D.       | 20568    | N.D.      | N.D.      | 46457   | 11015      | 82573      | 22885   | N.D.     | 1782120 | N.D.      | 49218    | 9936    | 56637     | 194327  |
| 74                                                                     | 440251   | 132400               | 1826459 | 6683      | 1916384 | 2044756 | 5966728  | 835962  | 1779771    | 742311  | 441057    | 61918   | 198211        | 532029         | 352494        | 82525      | 18659    | N.D.      | 6572      | N.D.    | 65061      | 138971     | 31136   | N.D.     | 613848  | 36307     | 9587     | 4182    | 636       | 148270  |
| 75                                                                     | 4115     | N.D.                 | 362823  | 8495      | 639252  | 730779  | 770750   | 79867   | 325685     | 143374  | 95494     | 15303   | 35131         | 269069         | 101978        | N.D.       | 25455    | N.D.      | N.D.      | N.D.    | 95592      | 71524      | 18148   | N.D.     | 142364  | N.D.      | N.D.     | 10047   | 877       | 439398  |
| 76                                                                     | 45367    | 95873                | 2731683 | 104845    | 4700132 | 2943067 | 9133027  | 702720  | 2697087    | 1800958 | 1085039   | 318430  | 318315        | 972372         | 1034610       | 458788     | 206468   | 106658    | 20169     | N.D.    | 473982     | 472375     | 217127  | 26281    | 1176101 | 190669    | 40652    | 26978   | 3639      | 1335680 |
| 77                                                                     | 73622    | N.D.                 | 32079   | 2258      | 172822  | 26878   | 14693    | N.D.    | 6922       | N.D.    | N.D.      | N.D.    | N.D.          | 10595          | 13157         | N.D.       | 883      | N.D.      | N.D.      | N.D.    | 4851       | 42         | N.D.    | N.D.     | 12113   | N.D.      | 2012     | N.D.    | N.D.      | 4165    |
| 78                                                                     | 265808   | 32839                | 598675  | 14320     | 832645  | 759851  | 1396359  | 149556  | 481496     | 183962  | 162713    | N.D.    | 104387        | 506197         | 273160        | 18416      | 60596    | N.D.      | N.D.      | N.D.    | 237112     | 189615     | 79268   | 21955    | 401857  | N.D.      | 4560     | 69271   | 7036      | 581849  |
| 79                                                                     | 351432   | N.D.                 | 15830   | N.D.      | 71400   | 1283    | 125      | N.D.    | N.D.       | N.D.    | N.D.      | N.D.    | 10284         | N.D.           | N.D.          | N.D.       | N.D.     | N.D.      | N.D.      | N.D.    | N.D.       | 54         | N.D.    | N.D.     | 81986   | N.D.      | 3536     | 3338    | 23        | 16838   |
| 80                                                                     | 367546   | 33652                | 636708  | 99330     | 912147  | 1971161 | 1311958  | 165933  | 292989     | 167517  | 199291    | 7417    | 110649        | 407661         | 314529        | 24077      | 12095    | N.D.      | 1184      | N.D.    | 73930      | 93974      | 106888  | N.D.     | 347172  | N.D.      | 4256     | N.D.    | N.D.      | 89494   |
| 81                                                                     | 535617   | 42424                | 2126590 | 58193     | 1307385 | 1984173 | 2927166  | 795114  | 1507597    | 692640  | 604247    | 394264  | 309894        | 955307         | 647655        | 182972     | 116423   | 24498     | 35022     | N.D.    | 354346     | 380659     | 347799  | 54986    | 498349  | 266675    | 89004    | 38311   | 11909     | 629598  |
| 82                                                                     | 827419   | 206949               | 1977044 | 53890     | 2581369 | 1030763 | 1447573  | 1148419 | 424112     | 63055   | 122473    | N.D.    | 139979        | 415486         | 212395        | 10416      | 40300    | N.D.      | 2109      | N.D.    | 62539      | 139638     | 160145  | 12685    | 1396882 | N.D.      | 41032    | 406     | 715512    |         |
| 83                                                                     | 598848   | 10731                | 7597    | 1421      | 196893  | 9876    | 3306     | N.D.    | 3370       | N.D.    | N.D.      | 3388    | N.D.          | N.D.           | N.D.          | N.D.       | 2034     | N.D.      | N.D.      | N.D.    | 1445       | 2528       | N.D.    | 6373     | 16188   | N.D.      | 4931     | 5940    | 504       | 126119  |
| 84                                                                     | 45177    | 414367               | 134853  | 9493      | 183351  | 180639  | 209431   | 20327   | 117538     | 22079   | 25910     | N.D.    | 13390         | 59900          | 39859         | N.D.       | 5108     | N.D.      | N.D.      | N.D.    | 8014       | 1921       | 9103    | N.D.     | 80760   | 34900     | N.D.     | 8304    | 29        | 74728   |
| 85                                                                     | 80698    | 18265                | 143717  | 679       | 757083  | 197772  | 95842    | 45139   | 26794      | N.D.    | N.D.      |         |               |                |               |            |          |           |           |         |            |            |         |          |         |           |          |         |           |         |



Table S3. Results of statistical analysis

| (VIP) score ( $\geq 1$ ) |           | p values ( $<0.05$ )  |         | Fold change ( $\geq 2$ )   |             | ROC curve ( $\geq 0.7$ ) |           |
|--------------------------|-----------|-----------------------|---------|----------------------------|-------------|--------------------------|-----------|
| Component                | VIP score | Component             | P value | Component                  | Fold Change | Component                | AUC curve |
| Aminomalonic acid        | 1.5882    | Aminomalonic acid     | 0.00027 | 2-hydroxybutanedionic acid | 2.0514      | Aminomalonic acid        | 0.7827    |
| Asparagine               | 1.3347    | Asparagine            | 0.00196 | 3-Hydroxybutanoic acid     | 7.8559      | Asparagine               | 0.7034    |
| Aspartic acid            | 1.8093    | Aspartic acid         | 0.00004 | 3-Hydroxypropanoic acid    | 2.0551      | Aspartic acid            | 0.7883    |
| Creatinine               | 1.2716    | Creatinine            | 0.00546 | Arabinose                  | 3.3981      | Creatinine               | 0.7605    |
| Glutamic acid            | 1.4898    | Glutamic acid         | 0.00080 | Asparagine                 | 6.4675      | Glucose                  | 0.7228    |
| Glycerol                 | 1.0190    | Glycine               | 0.00063 | Aspartic acid              | 2.8172      | Glutamic acid            | 0.7642    |
| Glycine                  | 1.4846    | Guanine               | 0.00744 | Citric acid                | 2.9518      | Glyceric acid            | 0.7148    |
| Guanine                  | 1.0623    | Hypoxanthine          | 0.00773 | Creatinine                 | 2.0583      | Glycine                  | 0.7531    |
| Hypoxanthine             | 1.0166    | Isoleucine            | 0.00367 | Cystine                    | 5.1549      | Guanine                  | 0.7327    |
| Isoleucine               | 1.3027    | Lactic acid           | 0.00095 | Ethylene glycol            | 3.2484      | Hypoxanthine             | 0.7460    |
| Lactic acid              | 1.5146    | Leucic acid           | 0.00070 | Fructose                   | 5.2426      | Isoleucine               | 0.7235    |
| Leucic acid              | 1.5797    | Methionine            | 0.00089 | Gluconic acid              | 2.4661      | Lactic acid              | 0.7840    |
| Leucine                  | 1.0658    | Phenyl alanine        | 0.00017 | Glutamic acid              | 2.5349      | Leucic acid              | 0.7744    |
| Methionine               | 1.4767    | Proline               | 0.00759 | Glyceric acid              | 2.2284      | Leucine                  | 0.7074    |
| Phenyl alanine           | 1.5778    | Pyruvic acid          | 0.00716 | Glycine                    | 2.2317      | Mannose                  | 0.7111    |
| Proline                  | 1.2765    | Ribose                | 0.00030 | Guanine                    | 2.2453      | Methionine               | 0.7358    |
| Pyruvic acid             | 1.2923    | Serine                | 0.00295 | Histidine                  | 2.9128      | Phenyl alanine           | 0.7698    |
| Ribose                   | 1.6368    | Succinic acid         | 0.00866 | Hypoxanthine               | 3.0589      | Proline                  | 0.7198    |
| Serine                   | 1.3398    | Threonine             | 0.00135 | Isoleucine                 | 2.3077      | Pyruvic acid             | 0.7611    |
| Succinic acid            | 1.3448    | Tryptophane           | 0.00049 | Lactic acid                | 2.0300      | Ribose                   | 0.7648    |
| Threonine                | 1.4197    | Tyrosine              | 0.00424 | Leucic acid                | 3.4193      | Serine                   | 0.7318    |
| Tryptophane              | 1.3664    | Uracil                | 0.01364 | Leucine                    | 2.2403      | Succinic acid            | 0.7148    |
| Tyrosine                 | 1.1720    | Valine                | 0.00677 | Lysine                     | 4.1900      | Threonine                | 0.7309    |
| Uracil                   | 1.2282    | Propionate            | 0.00642 | Methionine                 | 5.3313      | Tryptophane              | 0.7963    |
| Valine                   | 1.1676    | Heptanoate            | 0.00232 | Ornithine                  | 2.5081      | Tyrosine                 | 0.7392    |
| Hexanoate                | 1.6420    | Hexanoate             | 0.00057 | Phenyl alanine             | 2.7990      | Uracil                   | 0.7185    |
| 4-Methyl valeric acid    | 1.6098    | 4-Methyl valeric acid | 0.00009 | Proline                    | 2.8346      | Valine                   | 0.7241    |
| Heptanoate               | 1.2426    | -                     | -       | Serine                     | 3.1664      | Propionate               | 0.7478    |
| Isovaleric acid          | 1.1072    | -                     | -       | Sulfuric acid              | 8.6995      | Hexanoate                | 0.7456    |
| -                        | -         | -                     | -       | Threonine                  | 3.3205      | 4-Methyl valeric acid    | 0.7250    |
| -                        | -         | -                     | -       | Tryptophane                | 3.1904      | -                        | -         |
| -                        | -         | -                     | -       | Tyrosine                   | 2.7747      | -                        | -         |
| -                        | -         | -                     | -       | Uracil                     | 2.7906      | -                        | -         |
| -                        | -         | -                     | -       | Valine                     | 2.1534      | -                        | -         |
| -                        | -         | -                     | -       | Hexanoate                  | 13.5490     | -                        | -         |
| -                        | -         | -                     | -       | Heptanoate                 | 3.5964      | -                        | -         |
| -                        | -         | -                     | -       | Isovaleric acid            | 12.7100     | -                        | -         |
| -                        | -         | -                     | -       | Butyrate                   | 4.1664      | -                        | -         |
| -                        | -         | -                     | -       | 4-Methyl valeric acid      | 3.1293      | -                        | -         |

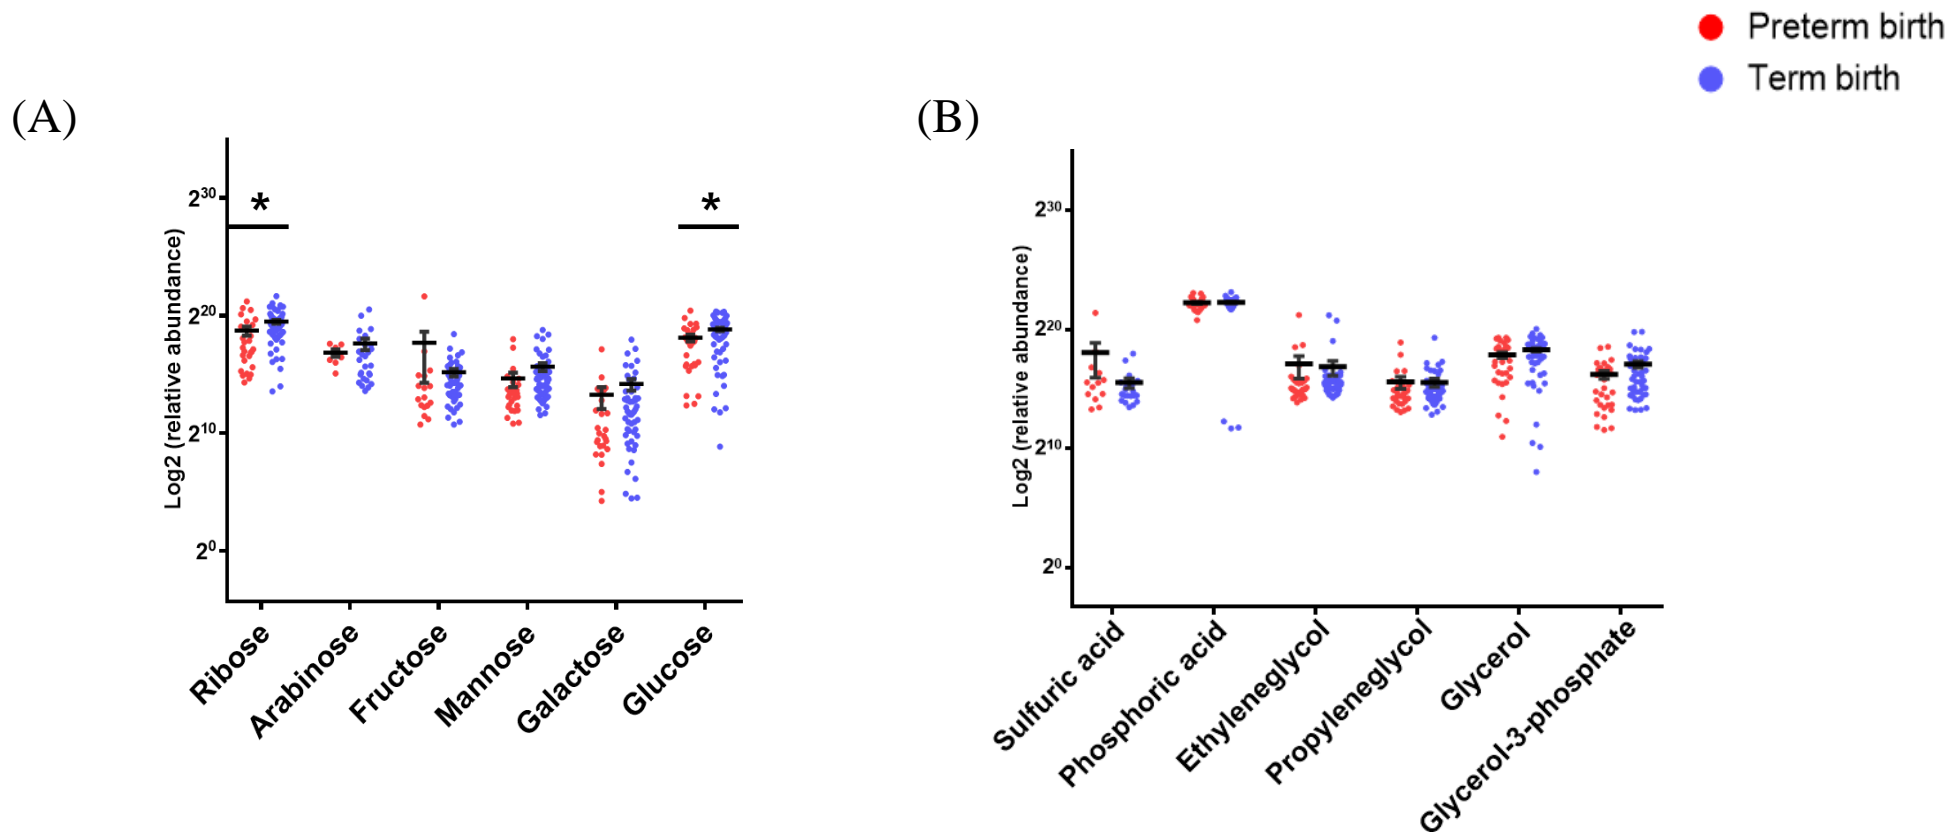

Figure S1. Metabolite level of preterm birth and term birth in cervicovaginal fluid.

The results of raw data were explained as mean  $\pm$  SEM. The graph used scatter dot plot of individual values and significance levels were determined by multiple t-test, and asterisks denote the post-test significance level (\* $p < 0.05$ ) of preterm birth (20-36 weeks) and term birth (37-41 weeks). (A) sugar and (B) the others

(A)

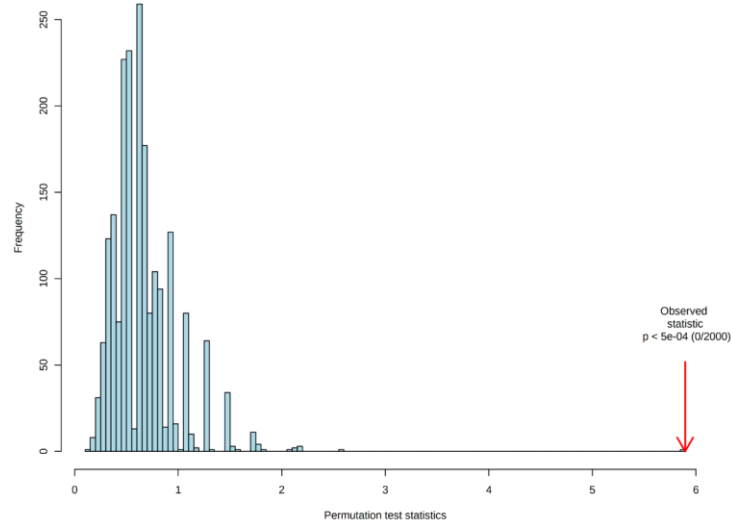

(B)

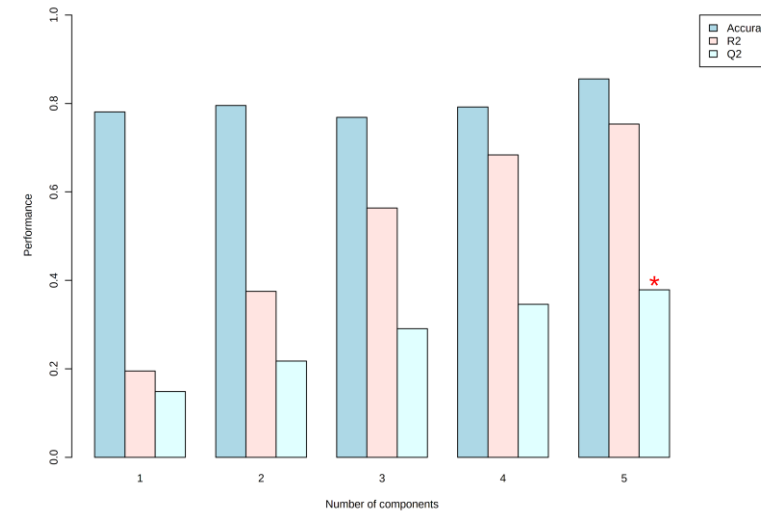

| Measure  | 1 comps | 2 comps | 3 comps | 4 comps | 5 comps |
|----------|---------|---------|---------|---------|---------|
| Accuracy | 0.78067 | 0.79533 | 0.76867 | 0.792   | 0.85533 |
| R2       | 0.19477 | 0.37535 | 0.56367 | 0.68374 | 0.75348 |
| Q2       | 0.14873 | 0.21761 | 0.2907  | 0.3459  | 0.37867 |

Figure S2. Validation of the statistical model used (A) permutation (2000 times) and (B) cross-validation

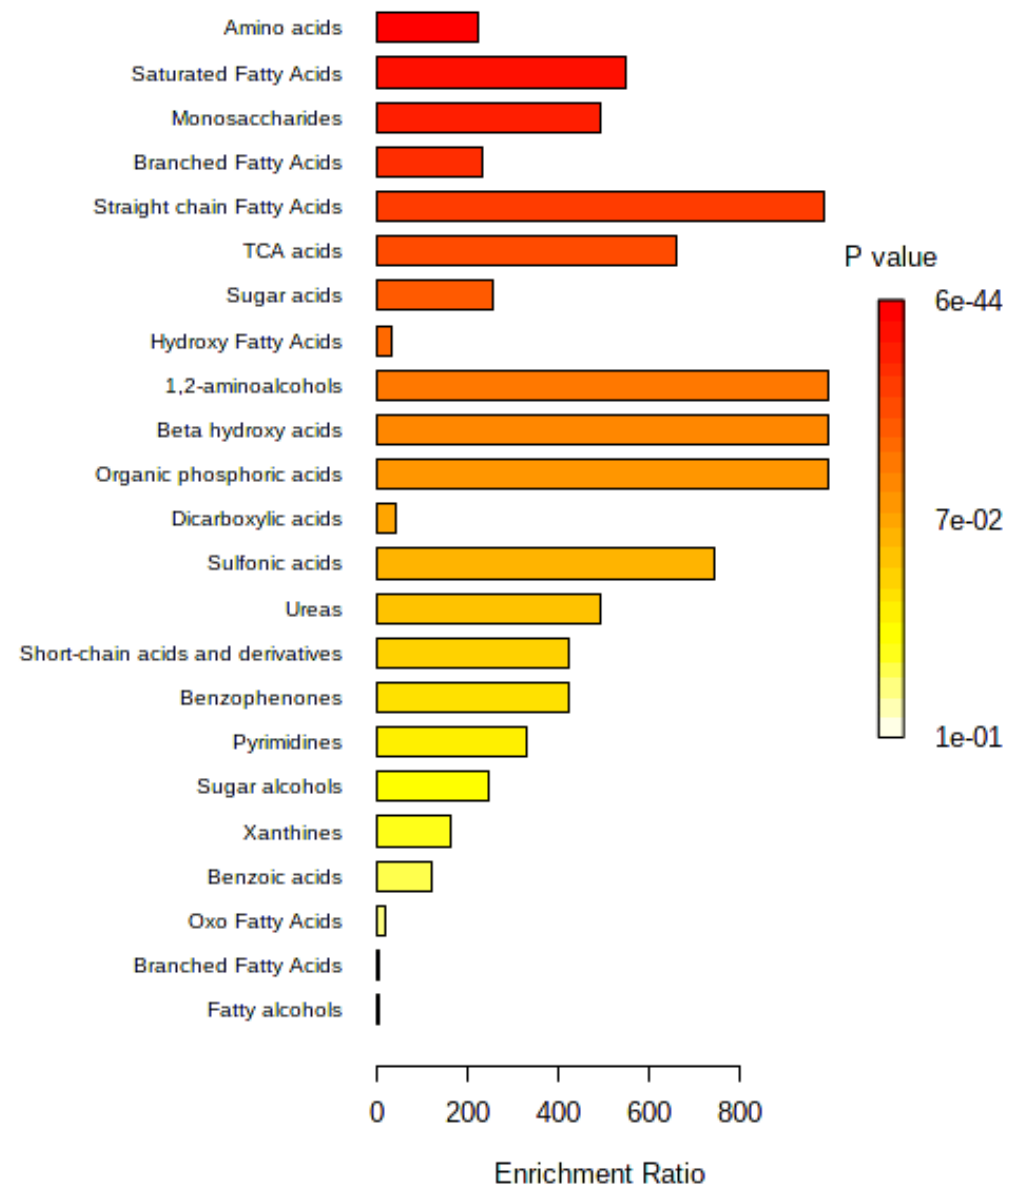

Figure S3. Metabolic pathway

Evaluation of derivatization reagent

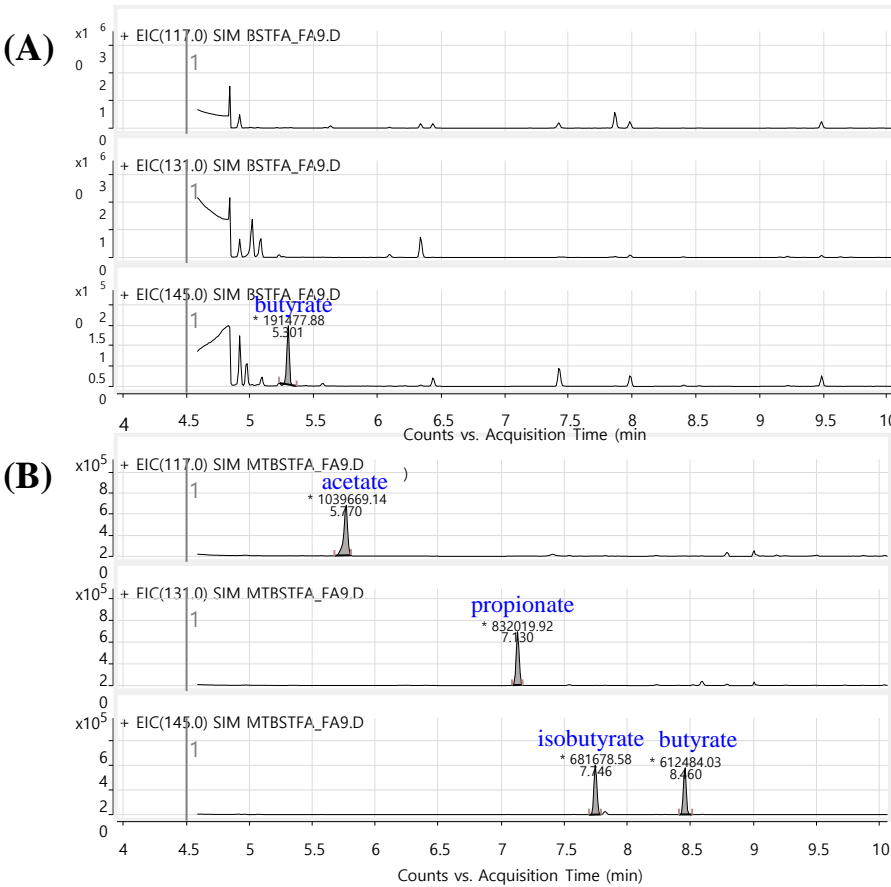

Figure S4. Comparison of derivatized-SCFA chromatograms using MTBSTFA and BSTFA reagent; (A) trimethylsilylized-SCFA; (B) *tert*-butyldimethylsilylized-SCFA; when derivatized with BSTFA, selectivity of acetate, propionate and isobutyrate were worse than MTBSTFA.

Optimization of preparation method

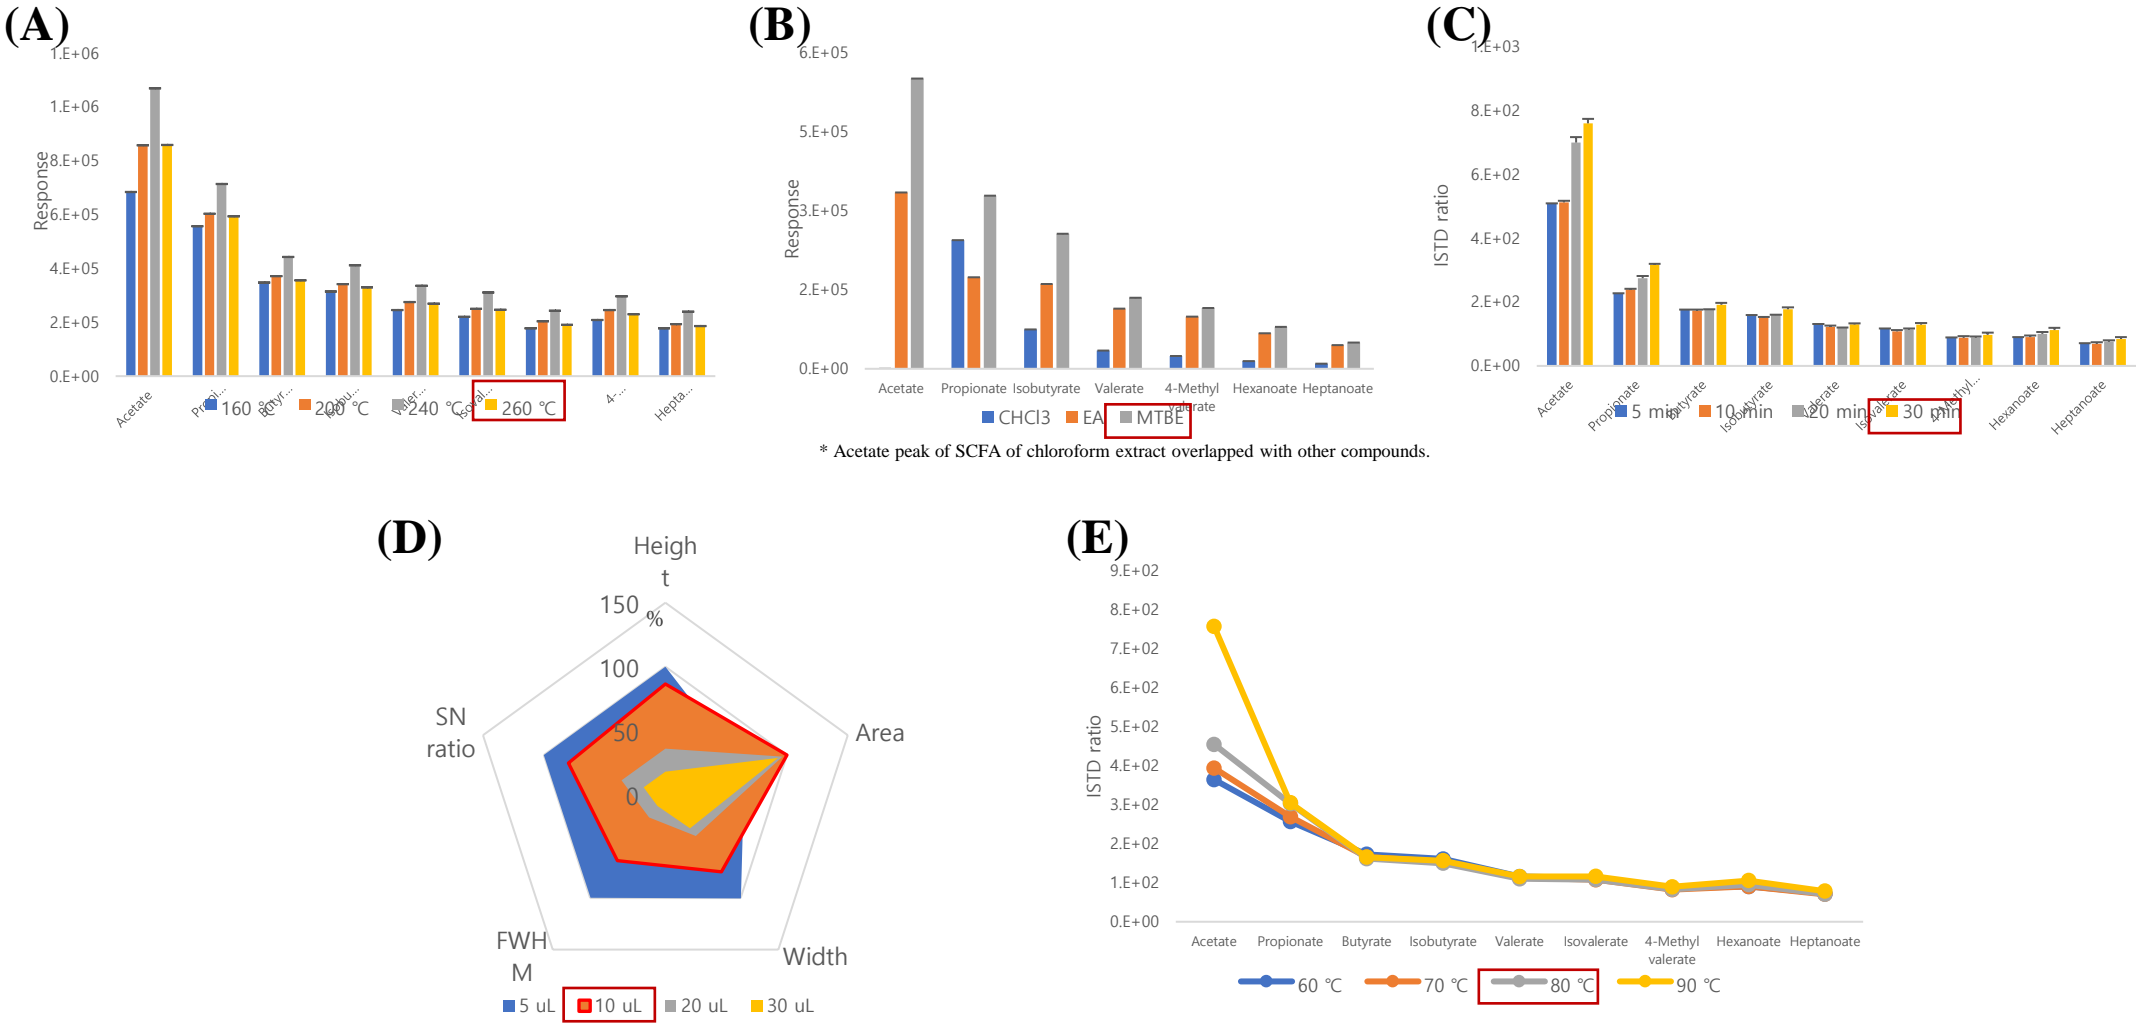

Figure S5. Optimization of preparation process of short chain fatty acid; (A) optimization of inlet temperature of GC, (B) extraction solvent screening, (C) optimization of derivatization time, (D) optimization of derivatization reagent volume, (E) optimization of derivatization temperature

Validation of analytical procedures

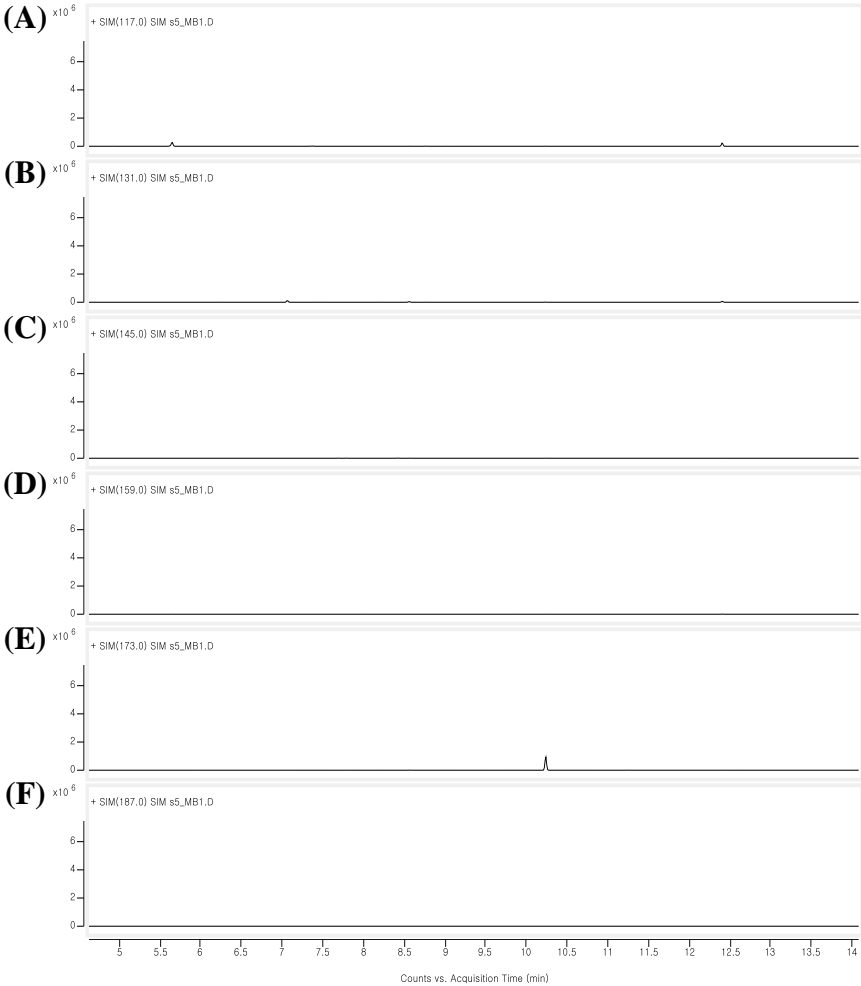

Figure S6. GC/MS chromatogram of blank sample (A) acetate, (B) propionate, (C) isobutyrate, butyrate, (D) isovalerate and valerate, (E) 4-methyl valerate and hexanoate and, (F) heptanoate

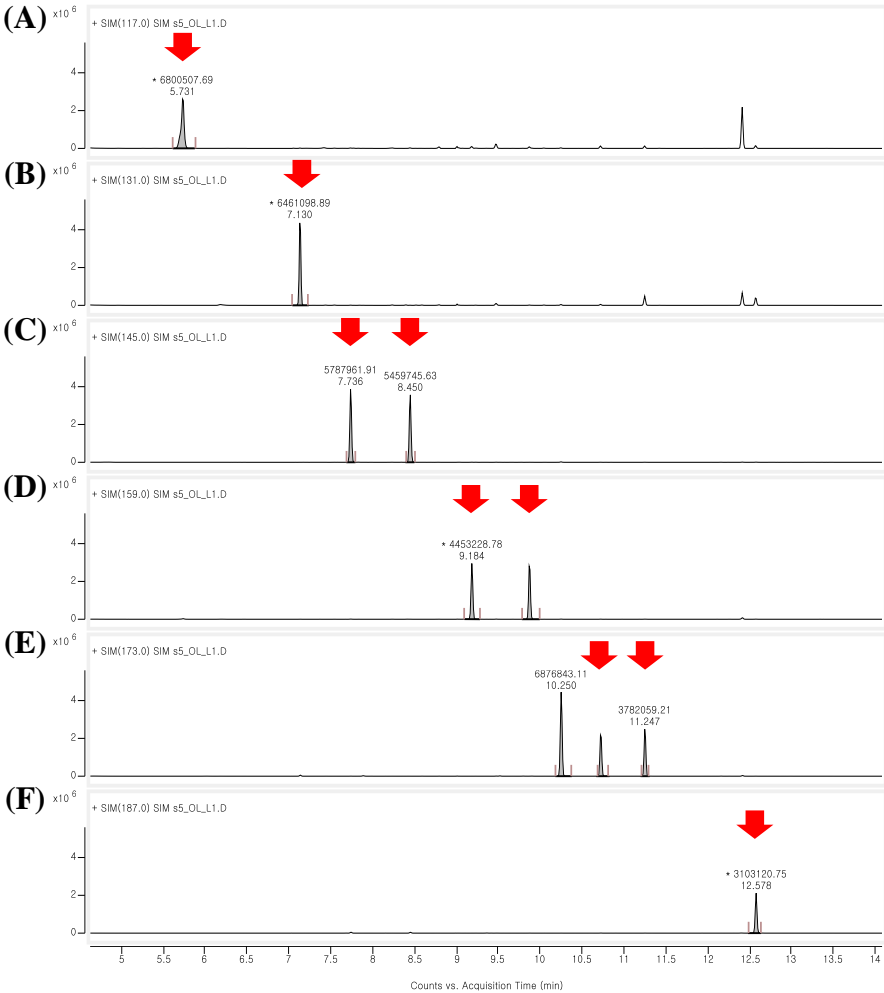

Figure S7. GC/MS chromatogram of blank sample spiked nine SCFAs (A) acetate, (B) propionate, (C) isobutyrate, butyrate, (D) isovalerate and valerate, (E) 4-methyl valerate, hexanoate, and (F) heptanoate

Validation of analytical procedures

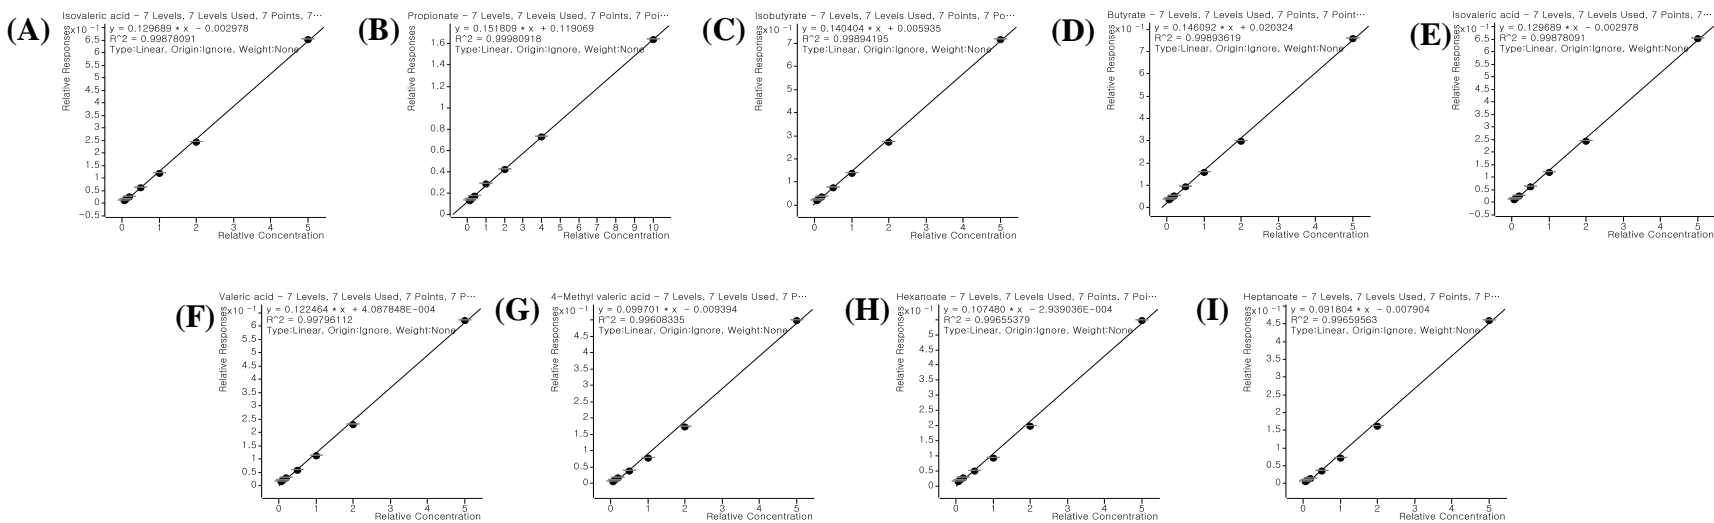

Figure S8. Calibration curves of nine SCFAs (A) acetate, (B) propionate, (C) isobutyrate, (D) butyrate, (E) isovalerate, (F) valerate, (G) 4-methyl valerate, (H) hexanoate, and (I) heptanoate

Table S4. Range of calibration curves of nine SCFAs

| Target compound                                                                        | Concentration range (µg/mL) |   |    |
|----------------------------------------------------------------------------------------|-----------------------------|---|----|
| Acetate                                                                                | 0.3                         | - | 30 |
| Propionate                                                                             | 0.1                         | - | 10 |
| Isobutyrate, butyrate, isovalerate, valerate, 4-methyl valerate, hexanoate, heptanoate | 0.05                        | - | 5  |



Table S5. Accuracy, precision, and recovery results of nine SCFAs

| Compound          | Spiked conc.<br>(ng/mL) | Intra-day (n=5) |         | Inter-day (n=3) |         | Recovery (%) | RSD (%) |
|-------------------|-------------------------|-----------------|---------|-----------------|---------|--------------|---------|
|                   |                         | Accuracy (%)    | RSD (%) | Accuracy (%)    | RSD (%) |              |         |
| Acetate           | 0.3                     | 109.1           | 19.0    | 99.8            | 10.7    | -            | -       |
|                   | 0.6                     | 101.8           | 13.4    | 98.3            | 18.6    | 84.0         | 8.2     |
|                   | 6                       | 114.8           | 13.6    | 101.7           | 12.8    | 87.3         | 14.0    |
|                   | 30                      | 91.9            | 8.8     | 93.5            | 4.2     | 91.6         | 13.4    |
| Propionate        | 0.1                     | 98.2            | 12.4    | 103.6           | 7.4     | -            | -       |
|                   | 0.2                     | 94.2            | 8.5     | 100.7           | 7.7     | 93.9         | 13.0    |
|                   | 2                       | 109.0           | 7.2     | 103.5           | 5.4     | 86.5         | 2.9     |
|                   | 10                      | 95.1            | 6.8     | 94.5            | 6.5     | 84.9         | 4.8     |
| Isobutyrate       | 0.05                    | 95.2            | 11.3    | 111.4           | 12.9    | -            | -       |
|                   | 0.1                     | 113.2           | 10.0    | 101.5           | 14.7    | 89.7         | 2.8     |
|                   | 1                       | 111.1           | 8.4     | 108.1           | 4.6     | 83.7         | 6.2     |
|                   | 5                       | 95.7            | 4.0     | 98.0            | 2.7     | 83.7         | 8.7     |
| Butyrate          | 0.05                    | 101.6           | 9.4     | 100.0           | 10.1    | -            | -       |
|                   | 0.1                     | 93.4            | 11.7    | 89.6            | 7.9     | 89.6         | 3.8     |
|                   | 1                       | 110.9           | 5.6     | 106.1           | 4.1     | 82.1         | 6.0     |
|                   | 5                       | 97.2            | 3.7     | 97.0            | 1.9     | 80.1         | 8.9     |
| Isovalerate       | 0.05                    | 112.5           | 1.1     | 100.2           | 11.2    | -            | -       |
|                   | 0.1                     | 93.1            | 6.9     | 92.0            | 3.1     | 84.6         | 3.4     |
|                   | 1                       | 104.1           | 6.7     | 104.0           | 4.7     | 82.5         | 3.2     |
|                   | 5                       | 100.8           | 2.3     | 100.1           | 1.2     | 82.3         | 7.6     |
| Valerate          | 0.05                    | 89.6            | 3.5     | 98.8            | 8.1     | -            | -       |
|                   | 0.1                     | 88.9            | 13.0    | 88.7            | 9.7     | 85.3         | 3.7     |
|                   | 1                       | 101.0           | 5.5     | 104.2           | 5.9     | 80.4         | 5.0     |
|                   | 5                       | 102.0           | 1.4     | 102.4           | 3.4     | 79.0         | 7.9     |
| 4-Methyl valerate | 0.05                    | 85.8            | 3.3     | 102.5           | 13.2    | -            | -       |
|                   | 0.1                     | 99.4            | 8.8     | 95.3            | 11.5    | 82.2         | 1.7     |
|                   | 1                       | 100.4           | 8.2     | 102.6           | 10.3    | 79.5         | 6.5     |
|                   | 5                       | 102.5           | 1.4     | 104.6           | 5.6     | 76.7         | 5.7     |
| Hexanoate         | 0.05                    | 83.8            | 14.2    | 101.1           | 14.9    | -            | -       |
|                   | 0.1                     | 95.4            | 7.1     | 92.0            | 4.5     | 91.2         | 9.2     |
|                   | 1                       | 97.4            | 3.4     | 101.8           | 7.0     | 79.8         | 6.8     |
|                   | 5                       | 104.4           | 1.6     | 104.5           | 4.2     | 80.7         | 12.8    |
| Heptanoate        | 0.05                    | 84.8            | 10.2    | 92.3            | 11.8    | -            | -       |
|                   | 0.1                     | 93.0            | 11.6    | 92.8            | 9.6     | 81.8         | 4.4     |
|                   | 1                       | 93.3            | 5.3     | 100.7           | 10.7    | 78.6         | 5.3     |
|                   | 5                       | 104.7           | 3.0     | 104.6           | 3.9     | 75.7         | 8.5     |

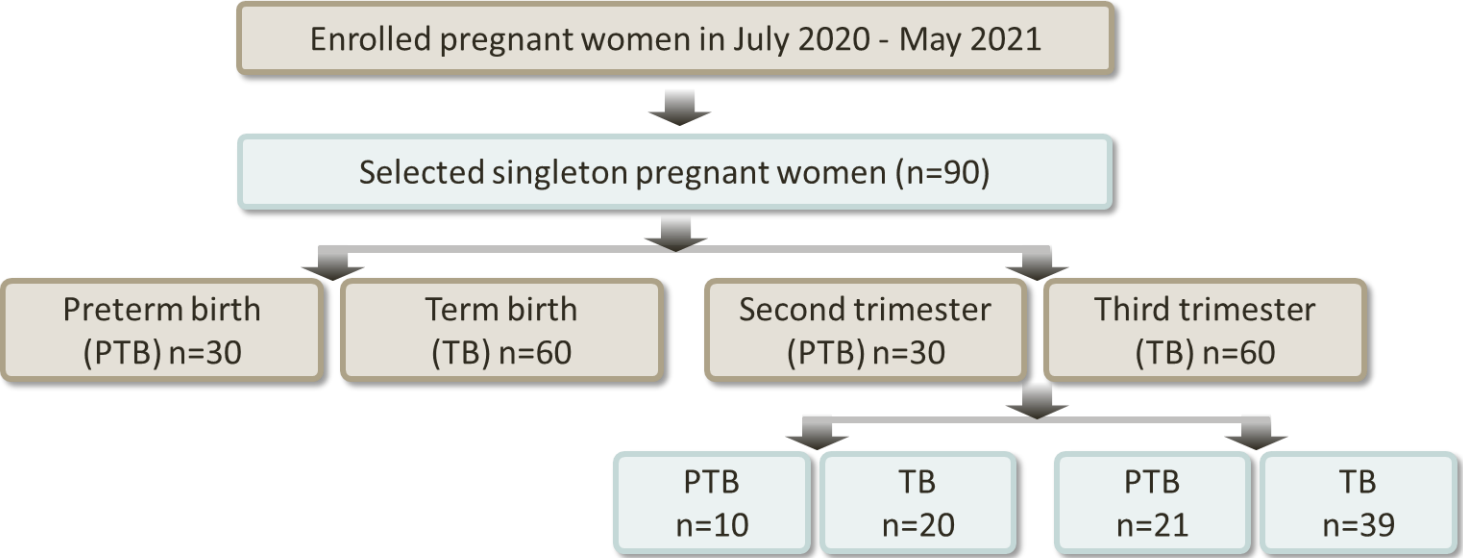

Figure S9. Study flowchart for subject selection criteria

Table S6. Clinical characteristics of subjects

| characteristics           | PTB (n=30) | TB (n=60) | P value |
|---------------------------|------------|-----------|---------|
| Age (years)               | 31.9±4.1   | 33.1±3.9  | 0.19    |
| Pre-pregnancy BMI (kg/m2) | 22.3±3.0   | 21.4±2.5  | 0.14    |
| GAS (weeks)               | 29.8±5.7   | 31.3±7.4  | 0.29    |
| GAB (weeks)               | 33.0±3.7   | 38.7±0.9  | <0.001  |

Data are presented as Mean±SD, p<0.05 considered as significant. PTB: Preterm birth; TB: Term birth; BMI: Body mass index; GAS: gestational age at sampling; GAB: gestation age at birth
